# 1 Evolution from adherent to suspension – systems 2 biology of HEK293 cell line development

3

4 Magdalena Malm<sup>1\*</sup>, Rasool Saghaleyni<sup>2\*</sup>, Magnus Lundqvist<sup>1</sup>, Marco Giudici<sup>1</sup>, Ve-  
5 ronique Chotteau<sup>1</sup>, Raymond Field<sup>3</sup>, Paul Varley<sup>3</sup>, Diane Hatton<sup>3</sup>, Luigi Grassi<sup>3</sup>,  
6 Thomas Svensson<sup>1,4</sup>, Mathias Uhlen<sup>1,5,6</sup>, Jens Nielsen<sup>1,5</sup> and Johan Rockberg<sup>1</sup>

7

8 \* Joint first authors contributing equally

9

10 1 KTH - School of Engineering Sciences in Chemistry, Biotechnology, and Health,  
11 Dept. of Protein Science, Royal Institute of Technology, SE-106 91 Stockholm,  
12 Sweden

13 2 Department of Biology and Biological Engineering, Chalmers University of  
14 Technology, SE-412 96 Gothenburg, Sweden

15 3 Biopharmaceutical Development, BioPharmaceuticals R&D, AstraZeneca, Mil-  
16 stein Building, Granta Park, Cambridge CB21 6GH UK

17 4 NBIS - Bioinformatics Systems Biology Support, Chalmers University of Tech-  
18 nology, SE-412 96 Gothenburg, Sweden

19 5 Novo Nordisk Foundation Center for Biosustainability, Technical University of  
20 Denmark, 2800 Kongens Lyngby, Denmark

21 6 KTH - Science for Life Laboratory, Royal Institute of Technology, SE-171 21,  
22 Stockholm, Sweden

23

24

## 25 **Corresponding authors:**

26 Jens Nielsen, Department of Biology and Biological Engineering, Chalmers Universi-  
27 ty of Technology, 41296 Gothenburg, Sweden

28 E-mail: nielsenj@chalmers.se

29

30 Johan Rockberg, KTH - Royal Institute of Technology, School of Engineering Sci-  
31 ences in Chemistry, Biotechnology and Health, S- 106 91 Stockholm, Sweden

32 E-mail: johan.rockberg@biotech.kth.se

33

34 Office: +46 8 790 99 88

35 Fax: +46 8 5537 8481

36

## 1 **Abstract**

2 The need for new safe and efficacious therapies has led to an increased focus on biologics  
3 produced in mammalian cells. The human cell line HEK293 has bio-synthetic potential  
4 for human-like production and is today used for manufacturing of several therapeutic pro-  
5 teins and viral vectors. Despite this increasing popularity there is still limited knowledge  
6 of the detailed genetic and composition of derivatives of this strain. Here we present a  
7 genomic, transcriptomic and metabolic gene analysis of six of the most widely used  
8 HEK293 cell lines. Changes in gene copy and expression between industrial progeny cell  
9 lines and the original HEK293 were associated with cellular component organization, cell  
10 motility and cell adhesion. Changes in gene expression between adherent and suspension  
11 derivatives highlighted switching in cholesterol biosynthesis and expression of five key  
12 genes (RARG, ID1, ZIC1, LOX and DHRS3), a pattern validated in 63 human adherent  
13 or suspension cell lines of other origin.  
14

## 1 **Introduction**

2 The production of protein therapeutics is a fast-growing field as it allows for the  
3 generation of sophisticated molecules with high specificity and activity in hu-  
4 mans (Leader et al., 2008)(Bandaranayake and Almo, 2014)(Alex Philippidis,  
5 2017; Walsh, 2014)(Alex Philippidis, 2017; Walsh, 2014). The need for proper  
6 protein folding and glycosylation of therapeutic proteins has promoted their  
7 production in mammalian cells, especially Chinese hamster ovary (CHO), but also  
8 human cells such as HEK293 (Zhu et al., 2012)(Dumont et al., 2016)(Priola et al.,  
9 2016; Sanchez-Garcia et al., 2016; Walsh, 2014). Even though CHO is the most  
10 common mammalian cell factory used for production of advanced recombinant  
11 proteins, there is an increasing demand for improved and more efficient biopro-  
12 duction platforms. With an increasing number of difficult-to-express proteins  
13 including next-generation biologics, such as bispecific antibodies and antibody-  
14 drug conjugates, entering clinical development, alternative or engineered ex-  
15 pression hosts are being explored. For instance, extensive omics profiling of the  
16 CHO cell has been carried out during recent years (Wlaschin et al.,  
17 2005)(Hammond et al., 2011)(Xu et al., 2011)(Brinkrolf et al., 2013)(Birzele et  
18 al., 2010)(Becker et al., 2011)(Sellick et al., 2011)(Dietmair et al., 2012), which  
19 has paved the way for cell line engineering efforts aiming to improve bioproduc-  
20 tion efficiency and product quality (Xiao et al., 2014)(Lee et al., 2015)(Kildegard  
21 et al., 2013). Moreover, human production cell lines, such as HEK293, can serve  
22 as convenient expression hosts for proteins with specific requirement for human  
23 post-translational modifications (Dumont et al., 2016)(Lalonde and Durocher,  
24 2017).

25  
26 The human cell line HEK293 is the most commonly utilized human cell line for  
27 expression of recombinant proteins for various research applications. This cell  
28 line originated from the kidney of an aborted human female embryo and was  
29 originally immortalized in 1973 by the integration of a 4 kbp adenoviral 5 (Ad5)  
30 genome fragment including the genes encoding the E1A and E1B proteins, at  
31 chromosome 19 (Graham et al., 1977) (Louis et al., 1997). The expression of E1A  
32 and E1B enable continuous culturing of HEK293 cells by inhibiting apoptosis and  
33 interfering with transcription and cell cycle control pathways (Berk, 2005). In  
34 addition, since E1A and E1B are essential helper factors for adeno associated vi-  
35 rus (AAV) production, the continuous expression of these genes makes HEK293  
36 cells attractive production hosts for recombinant AAV particles (Clément and  
37 Grieger, 2016).. The genomes and transcriptomic profiles of six different HEK293  
38 cell lines were recently mapped, confirming previous observations of a pseudo-  
39 triploid genome with the adenoviral DNA inserted on chromosome 19 (Y. C. Lin  
40 et al., 2014)(Bylund et al., 2004)(Louis et al., 1997). Furthermore, it was shown  
41 that standard laboratory culturing of the cell lines in most cases did not change  
42 the overall genomic composition of the cells although the organization of the  
43 HEK293 genome is continuously evolving through the events of chromosomal

1 translocations and copy number alterations (Y. C. Lin et al., 2014). However, the  
2 chromosome number of HEK293 cells derived from different commercial  
3 sources has been reported to show a high degree of variation, suggesting that  
4 long-term cultivation and subcloning of cells result in karyotypic drift (A.A.  
5 Stepanenko and Dmitrenko, 2015). Such abnormalities and genomic instability  
6 is, however, characteristic for immortalized cells and have also been reported for  
7 CHO cells (A.A. Stepanenko and Dmitrenko, 2015)(Väremo et al., 2014)(Vcelar et  
8 al., 2018)(Wurm, 2013).

9

10 Several HEK293 cell lines have been established from the parental HEK293 line-  
11 age. Strategies to improve recombinant protein expression include the genera-  
12 tion of transformed HEK293 cells constitutively expressing the temperature sen-  
13 sitive allele of the large T antigen of Simian virus 40 (293T), (DuBridgE et al.,  
14 1987) or the Epstein-Barr virus nuclear antigen EBNA1 (293E) (Murphy et al.,  
15 1992)(Swirski et al., 1992). Cell lines expressing these viral elements, enable epi-  
16 somal replication of plasmids containing the SV40 origin of replication (293T) or  
17 EBV oriP (293E). One 293E cell line is host for the production of dulaglutide  
18 (TRULICITY®)(Lalonde and Durocher, 2017). In addition, several HEK293 cell  
19 lines have been adapted to suspension growth in serum-free medium at high cell  
20 density (Graham, 1987)(Garnier et al., 1994)(Côté et al., 1998), enabling large-  
21 scale cultivation and bioproduction in bioreactors. Two industrially relevant  
22 suspension cell lines are 293-F and 293-H (Gibco, Thermo Fisher Scientific). The  
23 293-F clone was initially isolated by limiting dilution of HEK293 where a clone  
24 with fast growth and high transfectivity was obtained, which was later recloned  
25 and subjected to suspension growth adaptation in serum-free medium (**Figure**  
26 **1A**). Interestingly, the 293-H cell line is a suspension growth adapted clone origi-  
27 nally derived from a more adherent HEK293 cell clone. The final 293-H clone  
28 has high adherence during plaque assays, fast growth, high transfectivity and  
29 productivity (**Figure 1A**). The 293-F cell line is today used for the production of  
30 the regulatory approved rhFVIII (NUWIQ®), whereas 293-H cells are used for  
31 production of rFVIII Fc (ELOCTATE®) and rFIX Fc (ALPROLIX®)(Dumont et al.,  
32 2016)(Lalonde and Durocher, 2017). Furthermore, the Freestyle 293-F cell line  
33 has been generated by adaptation of 293-F cells to Freestyle medium (Gibco,  
34 Thermo Fisher Scientific). Even though each of the above-mentioned cell lines  
35 are all derived from the same original HEK293 strain, significant genomic and  
36 transcriptomic changes between parental and progenitor cell lines can be ex-  
37 pected due to the genomic instability of HEK293 as discussed above.

38

39 Despite extensive usage of CHO and HEK in both suspension and adherent mode  
40 and several empirical protocols for adaptation in either direction, molecular  
41 knowledge of the key genes involved in the transition between the two growth  
42 states is limited. While adherent cells have traditionally been widely used for the  
43 production of viruses, e.g. AAV and lenti virus for clinical research, suspension

1 cells are the platform of choice for the bioproduction of therapeutic proteins. The  
2 main advantages of suspension cell bioproduction schemes are growth at very  
3 high cell densities in serum-free medium at scale, enabling higher volumetric  
4 yields. Easy adaptation between cellular growth in adherent to suspension mode  
5 has traditionally been a key feature when selecting strains for bioprocess appli-  
6 cations, including usage of CHO and HEK293. Whereas certain experimental  
7 steps are more efficient in adherent mode, e.g. chemical transfection and viral  
8 infection, the ability to increase the volumetric cell density by growth in suspen-  
9 sion without cell clump formation that results in oxygen limitations is a key step  
10 from a manufacturing perspective.

11  
12 Here, we present a genomic and transcriptomic analysis of the HEK293 parental  
13 cell line along with five widely used HEK293 derivatives (**Figure 1A**). An overall  
14 analysis of the differences in genomic landscape and transcriptomic profiles was  
15 performed in order to provide novel molecular insights into the differences be-  
16 tween cell lines that have occurred during the process of clonal isolation and ex-  
17 pansion. Furthermore, we focus on transcriptomic differences between adherent  
18 and suspension HEK293 cells and the impact of the differentially expressed  
19 genes on metabolic pathways and the phenotype of the cells from a bioprocess  
20 perspective.

21

## 22 Results

23

### 24 **Overall genomic and transcriptomic profiles emphasize clonal divergence** 25 **between all the progeny cell lines compared to the parental HEK293 cell** 26 **line**

27 In this study, six industrially relevant HEK293 cell lines (**Figure 1A**) were sub-  
28 jected to omics profiling. This set of cell lines includes the parental HEK293 as  
29 well as five additional cell lines that have all been clonally derived from parental  
30 HEK293 cells. The cell lines can be divided into either adherent (HEK293, 293E  
31 and 293T) or suspension (293-H, 293-F and Freestyle 293-F) cells. The genomes  
32 and the transcriptomes of these six cell lines were sequenced using Illumina HiS-  
33 eq. **Table S1** provides full results of transcript levels (TPM) for all cell lines.  
34 Comparisons of the genomes and transcription profiles between the cell lines  
35 show overall similar results (**Figure 1B and 1C**). Hierarchical clustering divided  
36 the progeny cell lines into two different taxonomic groups, of either adherent  
37 (293T, 293E) or suspension cell lines (293-H, 293-F and Freestyle 293-F), di-  
38 verged from the parental HEK293. Interestingly, the original HEK293 cell line  
39 was the most distant from all other cell lines. As expected, the two 293-F lineages  
40 (293-F and Freestyle 293-F) showed very similar profiles. The same pattern of  
41 gene expression clustering was visualized by principal component analysis (**Fig-**  
42 **ure 1D**), where the suspension cell-lines grouped together in the plot, with a

1 very close clustering of 293-F and Freestyle 293-F cells. On the other hand, the  
2 adherent cell-lines HEK293E and HEK293T showed larger variations in gene ex-  
3 pression patterns between cell lines. The parental cell line HEK293 showed a no-  
4 table difference in transcriptome profile compared to all the other cell lines  
5 along the first principal component (PC1). These results indicate a genomic di-  
6 vergence of the clonal lineages compared to the parental HEK293 and suggest  
7 the presence of similar transcriptomic traits between HEK293 progeny cell lines  
8 individually selected for during the isolation of each clone. Hierarchical clustering  
9 of the cell lines based on SNPs gave a similar trend with high similarity between  
10 293-F and Freestyle 293-F cell lines, whereas the parental HEK293 cell line had  
11 lower similarities to the progeny the cell lines (**Figure S1A**). However, a different  
12 pattern of overall clustering was observed, with the original HEK293 and 293E  
13 cell lines separated from the rest on a separate branch and the lowest similarity  
14 scores observed for the 293E cell line compared to the rest.

15  
16 The HEK293 cell line was originally immortalized by the random integration of  
17 viral genomic DNA of adenovirus 5 (Graham et al., 1977), which includes the E1A  
18 and E1B genes. In this study, overall high mRNA levels of E1A and E1B were ob-  
19 served in all HEK293 cell lines (**Figure 1E**), with significantly ( $p < 0.05$ ) higher  
20 expression levels of E1A in HEK293, 293E and 293-H cell lines over the other cell  
21 lines, whereas 293F had a significantly ( $p < 0.05$ ) higher E1B expression com-  
22 pared to 293H and Freestyle 293-F (**Figure S1B**). No other significant differ-  
23 ences were observed for E1B. Furthermore, the 293T and 293E cell lines were  
24 originally generated by the transfection and stable integration of plasmids ex-  
25 pressing the SV40 Large T antigen and EBNA-1, respectively. As expected, the  
26 gene expression of Large T and EBNA-1 was detected in 293T and 293E, respec-  
27 tively (**Figure 1E**). Interestingly, expression of the Large T antigen was also ob-  
28 served in 293E, which is not reported by the supplier (ATCC). The presence of a  
29 truncated version of Large T in the 293E genome was confirmed by de novo as-  
30 sembly of all reads not mapping to the human reference genome (**Figure S1**).  
31 Tracing the origin of the 293E cell line (Swirski et al., 1992), the Large T expres-  
32 sion of 293E may be derived from the pRSVneo plasmid that was used to co-  
33 transfect HEK293 cells along with the pCMV-EBNA plasmid for the generation of  
34 the stable EBNA-1 expressing clone (293c18) by G418 selection. The pRSVneo  
35 plasmid contains a truncated version of the Large T gene (according to the  
36 AddGene vector Database), which aligns perfectly with the truncated Large T se-  
37 quence found in the 293E genome (**Figure S1C**).

38  
39 **Copy number variation between the parental HEK293 cell line and its de-**  
40 **derivatives confirmed the genomic instability of the HEK293 strain and iden-**  
41 **tified loci with conserved copy number gain/loss between progeny cell**  
42 **lines**

1 In order to evaluate the genomic variation between HEK293 and its derivatives  
2 further, overall genomic copy number variation of all progeny cell lines com-  
3 pared to the parental HEK293 was performed. A comparison of gained and lost  
4 regions on all chromosomes between all cell lines can be found in **Figure 2** and  
5 **Table S2**. Interestingly, a conserved pattern of copy number gain or loss of large  
6 regions has occurred on several chromosomes of all HEK293 progeny cells com-  
7 pared to HEK293, whereas other changes are more local or cell line specific. For  
8 instance, on chromosome 13, a region of >15 Mb (**Figure 2**) has been amplified  
9 significantly in all cell lines compared to the parental HEK293 strain. All ele-  
10 ments with copy number gain of >1 log<sub>2</sub> fold-change common to all progenitor  
11 cells are located in this region (**Table S2**). Amongst these, four out of seven pro-  
12 tein-coding genes (BORA, MZT1, PIBF1 and KLHL1) belong to the cytoskeleton  
13 gene set (GO:0005856). On chromosome 18, there is a conserved pattern of copy  
14 number loss of most of the chromosome sequence for all progeny cell lines com-  
15 pared to the parental HEK293 strain, with the exception of a high degree of copy  
16 number gain of a region close to the centromere for all cell lines except 293E.  
17 Within the region of conserved gain, several genes encoding cell adhesion mole-  
18 cules within the desmocollin (DSC) and desmoglein (DSG) subfamilies, belonging  
19 to the cell-cell adhesion gene set (GO: 0098609), are located. When analyzing  
20 more local copy number variations between progeny cell lines and the parental  
21 strain, some interesting loss or gain of full or partial elements compared to the  
22 parental HEK293 was identified. For instance, copy number loss was observed  
23 for the fumarate hydratase (FH) gene, which has previously been reported to  
24 have lost several gene copies in HEK293 and hence been hypothesized to play a  
25 role in the phenotypic transformation of HEK293 (Y.-C. Lin et al., 2014). Interest-  
26 ingly, the fumarate hydratase gene along with the neighboring kynurenine 3-  
27 monooxygenase (KMO) gene, had a log<sub>2</sub>-fold copy ratio of <-1 in 293T, 293-F and  
28 Freestyle 293-F cell lines compared to the parental HEK293 (**Figure 2** and **Fig-**  
29 **ure S2A**), suggesting that these cells have half the number of copies compared to  
30 the parental cell line. Moreover, the 293T and 293-H cell lines have a gain of the  
31 genomic loci surrounding the FH gene, while maintaining the copy number of the  
32 FH gene compared to HEK293. Interestingly, the resulting FH expression levels  
33 of the cell lines only partly correlated with the gene copy number changes (**Fig-**  
34 **ure 2** and **Figure S2A**). Even though the gene copy number of the parental  
35 HEK293 strain is the same as for 293T and 293-H lineages, the FH mRNA levels  
36 of HEK293 was as low as the expression levels of the lineages with only half  
37 number of FH gene copies. Moreover, the expression levels of KMO was compa-  
38 rably low in all cell lines but did not correlate with gene copy number. Besides  
39 the changes in gene copy number of the FH loci, a loci around the transducin-like  
40 enhancer protein 4 (TLE4) gene, encoding a transcriptional co-repressor of Wnt  
41 signaling pathway members, and the non-coding RNA LINC01507 was found to  
42 have a log<sub>2</sub>-fold copy number gain of >1.5 in all progeny cell lines except for  
43 293E (**Figure 2**). This gain in the TLE4 loci was accordingly reflected in the tran-

1 scription level of the gene with a higher level of expression in 293T, 293-H, 293-F  
2 and Freestyle 293-F compared to 293E and HEK293 (**Figure S2A**). In addition, a  
3 major loss of copy number of the ADAM3A pseudogene was observed for all cell  
4 lines accept 293-H with a maintained low or no expression of the psuedogene  
5 observed in the cell lines (**Figure 2** and **Figure S2AB**).

6

7 Due to the observed pattern of common genomic changes to progeny cell lines  
8 compared to the parental HEK293, an evaluation of common SNPs amongst all  
9 progeny cell lines but not HEK293 was performed. GO enrichment analysis of  
10 common genes with high or moderate impact SNPs different in all progeny cell  
11 lines compared to the original HEK293 (**Table S3**), showed significant (adjusted  
12 p-value <0.05) enrichment of homophilic cell adhesion via plasma membrane  
13 adhesion molecules (GO:0007156; adjusted p-value 0.025; fold enrichment  
14 10.26; data not shown) and cell-cell adhesion via plasma-membrane adhesion  
15 molecules (GO:0098742; adjusted p-value 0.032; fold enrichment 7.53; data not  
16 shown). All genes with moderate or high impact SNPs in progeny cell lines com-  
17 pared to HEK293 found amongst both these GO-terms were protocadherins  
18 (PCDH12, PCDHB10, PCDHB13, PCDHB15, PCDHB16 PCDHGA2, PCDHGA3 and  
19 PCDHGB2). In addition, the Teneurin-2 gene (TENM2) (within GO:0098742) also  
20 had an altered SNP allele in all progeny cell lines compared to HEK293. These  
21 SNPs all result in missense mutations with unknown biological impact on the  
22 gene products. However, the enrichment of common SNPs within this group of  
23 genes in all HEK293 progeny cell lines may suggest an impact on the protein  
24 function and a selective advantage of such phenotypic changes during continu-  
25 ous cell line cultivation.

26

### 27 **Differential expression between all progeny cell lines and the parental** 28 **HEK293 revealed consensus changes in gene expression of cellular compo-** 29 **nent organization and integral components of the plasma membrane** 30 **amongst progeny cell lines**

31 Based on the overall genomic and transcriptomic profiles of the different  
32 HEK293 cell lines, the parental HEK293 strain stood out as different compared to  
33 all other cell lines. In order to evaluate common changes between all progeny cell  
34 lines and the parental HEK293, differential expression analysis was performed.  
35 Results showed a significant consensus of down-regulation of genes involved in  
36 extracellular matrix organization, locomotion and cell adhesion in progeny cells  
37 compared to the parental HEK293 strain (**Figure 3A**). Moreover, amino acid me-  
38 tabolism and metabolic process of small molecules were found up-regulated in  
39 all progeny cell-lines. Along with changes in extracellular matrix genes, there is  
40 also a consensus amongst progeny cell lines compared to HEK293 of differential  
41 expression of genes involved in other types of cellular component organization  
42 such as cell morphogenesis, cytoskeleton organization, membrane organization  
43 and cell junction organization. A comparison between gene expression fold



1 changes and copy number variation of the differentially expressed genes (log<sub>2</sub>-  
2 fold change >+/- 1) for each progeny cell line compared to HEK293 showed a  
3 trend of enrichment of gained gene copies amongst genes with up-regulated  
4 mRNA levels (**Figure S2B**). However, there was not a clear trend of loss in gene  
5 copy number amongst transcriptionally down-regulated genes for all cell lines.

6  
7 For further evaluation of the transcriptomic similarities and changes between  
8 HEK293 cell lines, pairwise differential expression comparisons between all cell  
9 lines were performed. As expected, the parental cell line had the highest number  
10 of differentially expressed genes when compared to all other cell lines (**Figure**  
11 **3B** and **Table S4**). In addition, when looking at differentially expressed genes  
12 unique to certain comparisons, the largest group of genes were found common to  
13 all pairwise comparisons between HEK293 and each of the progeny cell lines  
14 (green bar in **Figure 3B**), again emphasizing a relatively high degree of common  
15 transcriptomic changes amongst progeny cell lines differentiated from the pa-  
16 rental HEK293. As the progeny cell lines had an enrichment of differentially ex-  
17 pressed genes associated with cellular component organization compared to  
18 HEK293, we sought to evaluate to what cellular compartments the 329 genes  
19 common to all pairwise comparisons between HEK293 and progeny cell lines lo-  
20 calize. In line with the overall differential expression evaluation (**Figure 3A**),  
21 which emphasized changes in for instance cell adhesion and extracellular matrix  
22 organization, there was a significant (padj <0.05) enrichment of genes relating to  
23 the integral compartment of plasma membrane (GO:0005887) amongst the  
24 common differentially expressed (DE) genes unique to the comparisons between  
25 HEK293 and all progeny cell lines (**Figure 3C**).

## 26 27 **Differential expression between suspension and adherent HEK293 cell** 28 **lines identified key changes related to cholesterol metabolism**

29 The growth morphology of bioproduction cell lines is of great importance for cul-  
30 ture maintenance and efficiency of industrial bioprocessing. In order to look into  
31 gene expression variations correlating with adherent and suspension HEK 293  
32 cell lines, differential expression analysis between adherent and suspension  
33 HEK293 progeny cell lines was performed. As results from the overall compari-  
34 son of transcriptomic profiles of the HEK293 cell lines showed that the parental  
35 HEK293 cell line is highly differentiated from all of the progeny cell lines and  
36 moreover, that the Freestyle 293-F cell line is very similar to the 293-F cell line,  
37 HEK293 and Freestyle 293-F were excluded from this analysis, so as not to skew  
38 the data. Enrichment analysis of the differentially expressed genes between ad-  
39 herent (293T and 293E) and suspension (293-H and 293-F) progeny cell lines  
40 showed significant expression differences of similar gene sets as in the compari-  
41 son between progeny cell lines and the parental HEK293 (**Figure 3A and 4A,**  
42 **Table S5**). For instance, the suspension progeny cell lines had a significant up-  
43 regulation of gene sets involved in cellular compartment organization such as

1 cell morphogenesis, cell junction organization, cell membrane organization and  
2 cytoskeleton organization. Interestingly, there is no significant change in the ex-  
3 pression of the extracellular matrix organization gene set between suspension  
4 and adherent HEK293 progeny cell lines. Perhaps as expected, there was signifi-  
5 cant differential expression observed for the cell adhesion, cell differentiation,  
6 cell morphogenesis and cell motility gene sets. Interestingly, all of the above-  
7 mentioned gene categories, including cell adhesion, were up-regulated in sus-  
8 pension HEK293 cells as compared to adherent. When looking at the most signif-  
9 icantly differentially expressed genes (adjusted p-value <0.01) amongst the cell  
10 adhesion gene set, many genes of the cadherin superfamily of cell adhesion mol-  
11 ecules were found up-regulated in suspension cell lines compared to adherent  
12 HEK293 progeny cells (**Table S6**).

13  
14 In order to evaluate what metabolic impact the differentially expressed genes  
15 may have on cells in suspension compared to the adherent state, a generic hu-  
16 man metabolic model, HMR2 (Mardinoglu et al., 2014), was used to generate a  
17 set of metabolic genes and their assigned pathways to find metabolic pathways  
18 with altered expression between adherent and suspension HEK293 progeny cell  
19 lines. As shown in **Figure 4B**, pathways related to aromatic amino acids and oxi-  
20 dative phosphorylation were significantly down-regulated in suspension cells  
21 compared to adherent and had amongst the highest number of differentially ex-  
22 pressed genes. In addition, pathways related to retinol, linoleate and nucleotide  
23 metabolism were also significantly down-regulated in suspension cell-lines. On  
24 the other hand, biosynthesis and metabolism of cholesterol were found to be  
25 most significantly up-regulated amongst metabolic pathways in suspension  
26 compared to adherent cells. In addition, pathways related to protein modifica-  
27 tion and fatty acid metabolism (omega-3/6 fatty acid metabolism, fatty acid de-  
28 saturation, fatty acid biosynthesis and fatty acid elongation) were also up-  
29 regulated in suspension compared to adherent HEK293 progeny cell lines. All  
30 results from the metabolic gene set analysis are provided in **Table S7**.

31  
32 Focusing on the pairwise comparisons between HEK293 cell lines, 38 differen-  
33 tially expressed genes were identified common to all adherent to suspension  
34 pairwise comparisons (red column in **Figure 3B**, **Figure 5A**, **Table S4**). Looking  
35 into potential underlying genomic alterations of these genes, no high impact or  
36 moderate single nucleotide polymorphism (SNP) was detected in any of cell lines  
37 that could explain the differential expression (data not shown). Three of the  
38 genes (ARRDC3, HMGCS1 and PCYOX1L) had the same directional gene copy  
39 number variation (gain or loss) compared to gene expression fold-changes (up  
40 or down) of all suspension compared to adherent cells, which may at least partly  
41 explain the differential expression of these genes between the groups. Gene en-  
42 richment analysis of this set of 38 differentially expressed genes between adher-  
43 ent and suspension cells, performed using Enrichr (Kuleshov et al., 2016)(Chen

1 et al., 2013), predicted the cholesterol biosynthetic process pathway as the cellu-  
2 lar pathway most affected by this expression variation (**Figure 5B**). This result  
3 further emphasizes the differential expression between adherent and suspension  
4 cells of genes involved in the cholesterol pathway, mentioned above. Among the  
5 38 common differentially expressed genes MSMO1, IDI1, NPC1L1, INSIG1 and  
6 HMGCS1 are directly related to cholesterol biosynthesis (GO:0006695 and/or  
7 GO:0008203, **Figure 5B**). Each of these genes had at least a two-fold increase in  
8 expression in the suspension cells compared with the adherent cell-lines. Based  
9 on these findings, we sought to predict the effect of the differentially expressed  
10 genes between adherent and suspension HEK293 cell lines on the cholesterol  
11 biosynthesis of the cells using Ingenuity pathway analysis (IPA). Although the  
12 MSMO1, IDI1 and HMGCS1 genes were all up-regulated in 293-F and 293-H com-  
13 pared to HEK293, the down-regulation of the lathosterol oxidase gene (SC5D),  
14 which gene product is in downstream steps of the pathway, resulted in a predict-  
15 ed reduction in cholesterol production in 293-F and 293-H cells compared to  
16 HEK293 (**Figure S3**). Comparisons between suspension cell lines (293-F and  
17 293-H) and adherent progeny cell lines (293E and 293T) did not result in any  
18 predicted changes in cholesterol biosynthesis (data not shown).

19  
20 As four out of the 38 differentially expressed genes (LOX, SMAD7, ID1 & TXNIP)  
21 have previously been shown to have a role in the epithelial to mesenchymal  
22 transition (EMT) pathway (Zhao et al., 2015), we sought to evaluate the role of  
23 this pathway in the transition from adherent to suspension cell growth of these  
24 HEK293 cell lines. The normalized expression of a set of EMT markers showed  
25 that the parental HEK293 actually had the highest level of expression of various  
26 mesenchymal markers (N-cadherin, vimentin and fibronectin) of all the six cell  
27 lines (**Figure S4A**). Moreover, when predicting EMT pathway outcomes for sus-  
28 pension cells (293F and 293H) compared to the parental HEK293 strain using  
29 Ingenuity pathway analysis (IPA), the results predicted reduced EMT in the sus-  
30 pension progeny cells compared to HEK293 (**Figure S4B**). However, suspension  
31 cells were predicted to have increased disruption of adherence junctions, which  
32 is consistent with the suspension cell phenotype. Taken together the comparison  
33 between adherent and suspension HEK293 progeny cell lines suggest that the  
34 transition between adherent to suspension cell growth is not equivalent to the  
35 epithelial to mesenchymal transition even though several EMT-associated genes  
36 may be key to the difference between cell lines. Instead key changes were found  
37 associated with cholesterol biosynthesis and fatty acid metabolism.

38  
39 **Extended validation of the 38 consistently differentially expressed genes**  
40 **between adherent and suspension HEK293 cell lines in a set of 63 human**  
41 **cell lines identified five key genes potentially associated with differences**  
42 **between adherent and suspension phenotypes**

1 For identification of key genes involved in the transition from adherent to sus-  
2 pension morphology, expression data from an additional set of 63 different hu-  
3 man cell lines deposited in the Human Protein Atlas database (Uhlen et al., 2017)  
4 were analyzed. Principal component analysis of these cell lines resulted in clus-  
5 tering of suspension cell lines in a distinct group separated from adherent cell  
6 lines (**Figure 6A**). However, since most of the suspension cell lines are of lym-  
7 phoid or myeloid origin this clustering may be a result of a similar origin of sus-  
8 pension cell lines. Transcription data of the 38 previously identified differentially  
9 expressed genes from 47 adherent and 16 suspension cell lines (**Table S8**) was  
10 compared between the two groups using a Mann-Whitney U-test. Within this set,  
11 nine genes (LOX, ID1, ADAMTS1, ZIC1, KCNMA1, DHRS3, RARG, COL4A6 and  
12 ARRDC4) had significant different expression levels between adherent and sus-  
13 pension cell lines with p-values <0.01 (**Figure 6B and 6C**). Four of these genes  
14 (ADAMTS1, KCNMA1, COL4A6 and ARRDC4) had the opposite directional change  
15 in the extended data set compared to the differential expression between only  
16 HEK293 strains. Based on these findings, the remaining five genes (LOX, ID1,  
17 ZIC1, DHRS3 and RARG), which showed a consistent down-regulation in suspen-  
18 sion cell lines compared to adherent cells, may play important roles in the mor-  
19 phological differences between the adherent and suspension cell lines.

20

## 21 **Methods**

22

### 23 **Cell cultivation for DNA and RNA preparation**

24 The adherent cell lines HEK293 (ATCC-CRL-1573), HEK293T (ATCC-CRL-3216)  
25 and 293E (ATCC-CRL-10852) were obtained from ATCC and propagated in  
26 DMEM (D6429) supplemented with 10% FBS at 37°C in a humidified incubator  
27 with 5% CO<sub>2</sub> in air. Suspension cell lines 293-F, 293-H and Freestyle™ 293-F  
28 (Gibco) were obtained from Thermo Fisher Scientific and cultivated in 293 SFM  
29 II medium (Gibco) supplemented with Glutamax at a final concentration of 4 mM  
30 (Gibco). Suspension cells were cultivated in 125-ml Erlenmeyer shake flasks  
31 (Corning) at 37°C and 120 rpm in a humidified incubator with 8% CO<sub>2</sub> in air. All  
32 cells were propagated from frozen stocks for no longer than 20 passages.

33

### 34 **RNA and DNA preparation and sequencing**

35 Adherent cells were detached by trypsinization and both adherent and suspen-  
36 sion cells were harvested by centrifugation. Genomic DNA was extracted using  
37 the Blood and Cell Culture DNA Mini Kit (Qiagen) according to the manufactur-  
38 er's guidelines and concentrations were determined by using a NanoDrop ND-  
39 1000 spectrophotometer (Thermo Scientific). Genome sequencing was per-  
40 formed at the National Genomics Infrastructure (Scilifelab, Solna, Sweden) using  
41 the Illumina HiSeq X platform. For RNA extraction, cells grown in log phase from  
42 three biological replicates were collected (derived from successive propaga-  
43 tions). Cell pellets were resuspended in RNAlater Stabilization Solution (Invitro-

1 gen) according to the manufacturer's recommendations until RNA extraction. To-  
2 tal RNA was extracted from three replicates of each cell line using Qiagen's RNe-  
3 asy plus Mini Kit according to the manufacturer's instructions. Concentrations  
4 were determined with a NanoDrop ND-1000 spectrophotometer and RNA quali-  
5 ty was assessed on a 2100 Bioanalyzer (Agilent Technologies) using RNA 6000  
6 Nano chips (Agilent Technologies). All samples had an RNA integrity number of  
7 at least 9.9. RNA sequencing was performed at GATC (Konstanz, Germany) using  
8 the Invivio Transcriptome Advance service and an Illumina HiSeq instrument.

9

## 10 **DNA-sequencing analysis**

11 Genome sequencing reads were aligned to the reference (human\_g1k\_v37.fasta)  
12 using bwa (0.7.12) (Li and Durbin, 2010). The raw alignments have then been  
13 deduplicated, recalibrated and cleaned using GATK (version 3.3-0-g4e03042,  
14 gatk-bundle/2.8) (McKenna et al., 2010). Quality control information was gath-  
15 ered using Qualimap (v2.2) (Okonechnikov et al., 2016). SNVs and indels have  
16 been called using the HaplotypeCaller. These variants were then functionally an-  
17 notated using snpEff (4.1). The Piper pipeline from the National Genomics Infra-  
18 structure was used. The correlation between BAM files was assessed using  
19 multibamssummary and its plotCorrelation function from deepTools2 (Ramírez et  
20 al., 2016). Spearman was used to calculate correlation coefficients between sam-  
21 ples, and the clusters are joined with the Nearest Point Algorithm. An SNP corre-  
22 lation heat map was generated using seqCAT (Fasterius and Al-Khalili Szgyarto,  
23 2018). The heatmap was based on the similarity scores (Yu et al., 2015) between the  
24 cell lines and euclidean distances. To compare the Large T antigen sequences of  
25 293T and 293E, unmapped reads were extracted to new bam files using  
26 SAMtools (Li et al., 2009), converted to fastq with BEDTools (Quinlan and Hall,  
27 2010), and de novo assembled with MEGAHIT (Li et al., 2016). NCBI BLAST was  
28 used to identify the Large T antigen in the assembled contigs. To evaluate and  
29 visualize copy number variations, CNVkit (Talevich et al., 2016) was used with its  
30 whole-genome sequencing method, cbs segmentation (Olshen et al.,  
31 2011) (Venkatraman and Olshen, 2007) and the HEK293 alignment as reference.  
32 GO enrichment analysis of genes with high or moderate impact SNPs was per-  
33 formed using PANTHER classification system (Mi et al., 2019).

34

## 35 **RNA-sequencing data**

36 Kallisto (Bray et al., 2016) was used to quantify transcripts, and the transcripts  
37 were mapped to the human GrCh37 genome. Log transformed normalized data  
38 by DESeq2 was used for cell line clustering and calculation of Euclidean sample  
39 distances. Significant testing of differential mRNA expression of E1A/B elements  
40 was done by Welsh two sample t-test. For differential expression analysis, raw  
41 count data from Kallisto was imported using the tximport package (Soneson et  
42 al., 2015) and analyzed with DESeq2 (Love et al., 2014). In the differential ex-  
43 pression analysis, all suspension cell-lines were compared to all adherent cell-

1 lines, and additionally, all pairwise combinations between suspension and ad-  
2 herent cell-lines were evaluated. The expression comparison of the viral ele-  
3 ments was based on normalized counts from DESeq2. For evaluating differential  
4 expression of 38 common differentially expressed genes between adherent and  
5 suspension HEK293 cell lines in a set of 63 human cell lines, RNA-seq data from  
6 each cell line deposited in the HPA database was used. Based on the growth  
7 characteristics, cells were divided into two groups of adherent and suspension  
8 cells. A Mann-Whitney U-test was used to compare normalized counts based on  
9 library size between the two groups for each of the 38 differentially expressed  
10 genes.

### 11 **Gene Set analysis**

12 To discover significant alterations of gene sets and metabolic pathways between  
13 HEK293 cell lines, the Piano package in R was used (Väremo et al., 2013). The  
14 adjusted p-values and fold changes from the differential expression was used in  
15 combination with a gene set collection based on “goslim\_generic Biological Pro-  
16 cess”. The heatmap for the progeny cells lines vs. HEK293 was based on the con-  
17 sensus score from all pairwise gene set statistics calculations with Wilcoxon  
18 rank-sum test. The heatmap for suspension cells (293-H, 293-F) vs. adherent  
19 cells (293E, 293T) was based on the consensus score from gene set statistics cal-  
20 culations with mean, median, sum, stouffer and tailStrength tests. To produce the  
21 network plot, gene sets were exported from HMR2 (Mardinoglu et al., 2014). For  
22 finding differentially expressed pathways of genes between adherent and sus-  
23 pension cell lines, we used Wilcoxon as statistical test and filtered gene sets with  
24 adjusted p-value lower than 0.05 as significantly changed. In addition, for gene  
25 set analysis of 38 common DE genes between adherent and suspension cell lines  
26 we used EnrichR and GO biological process as gene set collection (Kuleshov et al.,  
27 2016).

### 28 **Ingenuity pathway analysis**

29  
30 In order to predict the pathway changes between cell lines based on differential-  
31 ly expressed genes from pairwise comparisons, ingenuity pathway analysis (IPA,  
32 QIAGEN Inc.,) was performed. To consider a gene as differentially expressed we  
33 used log<sub>2</sub> fold change >1 or <1 and adjusted p-value <0.05. For filtering results of  
34 gene set analysis by IPA we used Benjamini-Hochberg multiple testing corrected  
35 p-values lower than 0.05 to find gene sets with a different expression pattern.  
36

## 1 **Discussion**

2 Due to the extensive usage of HEK293 cells as a bioproduction platform for  
3 pharmaceutical proteins and AAV vectors, characterization of the HEK293 ge-  
4 nome and transcriptome is relevant for bioprocess development. A deeper  
5 knowledge of the HEK293 genomic and transcriptomic traits can for instance  
6 pave the way for more rational cell line engineering approaches, aiming to im-  
7 prove bioproduction efficiency and quality of protein products. As different  
8 HEK293 lineages are propagated under different conditions and the observation  
9 that immortalized continuously cultured cell lines, such as HEK293, have a high  
10 degree of genomic instability with frequent chromosome rearrangements (Y. C.  
11 Lin et al., 2014)(A. A. Stepanenko and Dmitrenko, 2015) it can be expected that  
12 different HEK293 lineages are differentiated at the genomic and transcriptomic  
13 level compared to the parental cell line. Here, the genomes and transcriptomes of  
14 the original HEK293 along with five progeny cell lineages were analyzed (**Figure**  
15 **1A**). The overall comparison of genomic and transcriptomic profiles confirmed  
16 the picture of clonally diverged progeny cells as compared to the parental  
17 HEK293. A common hierarchical clustering between the cell lines was observed  
18 for both genomic and transcriptomic comparisons with the parental HEK293 cell  
19 line, the progeny suspension cell lines and the progeny adherent cells clustering  
20 on three separate branches (**Figure 1B** and **1C**). As expected, there was a high  
21 degree of genomic and transcriptomic similarities of the Freestyle 293-F and  
22 293-F cell lines (**Figure 1B, 1C** and **1D**). It is unclear whether these two cell lines  
23 are actually the same clone or if the Freestyle 293-F cell lineage was isolated  
24 through sub-cloning of 293-F. The results presented here indeed show that they  
25 are highly similar both on a genomic and transcriptomic level and confirms the  
26 previously reported findings that standard propagation of HEK293 cell lines  
27 does not alter the genomic profile to a large extent (Y. C. Lin et al., 2014) Fur-  
28 thermore, based on the hierarchical clustering, the adherent progeny cell lines  
29 showed a higher degree of divergence from each other compared to suspension  
30 cells. This may be a result of the independent transformation and isolation of the  
31 293T and 293E lineages by the stable integration of different viral genes in dif-  
32 ferent labs. Whereas all the six HEK293 cell lines constitutively express the E1A  
33 and E1B genes (**Figure 1E**), which is beneficial for the production of lenti- and  
34 AAV viruses for gene therapy, the 293T and 293E cell lines also constitutively  
35 express the Large T antigen and EBNA-1, respectively (**Figure 1E**). Interestingly,  
36 a truncated version of the Large T antigen was also found to be expressed in  
37 293E cells, which has to our knowledge not been reported previously (**Figure**  
38 **S1**). The Large T antigen sequence was likely derived from the pRSVneo plasmid  
39 that was co-transfected with pCMV-EBNA1 during the isolation of the 293E c18  
40 clone (Swirski et al., 1992).

41 **Progeny HEK293 cell lines carry common genomic and transcriptomic**  
42 **traits independently evolved during cell line development**

1 Notably, the overall comparison of the genomic and transcriptomics profiles of  
2 HEK293 cell lines suggests that the parental HEK293 strain has the highest di-  
3 vergence amongst the cell lines and suggests common changes independently  
4 evolved in all progeny cell lines. In line with these findings, common changes in  
5 gene copy number gain or loss (**Figure 2**) and consensus differential expression  
6 alterations (**Figure 3**) were observed amongst all progeny cell lines when com-  
7 pared to HEK293. Especially, a common pattern of copy number gain and loss for  
8 progeny cell lines was observed on chromosome 13 and 18 (**Figure 2**). Such pat-  
9 terns, found across all or several lineages of HEK293 isolated independently by  
10 different methods, suggests a selective advantage for altered copy numbers of  
11 these loci in regard to the phenotypes of the cell lines. On chromosome 13, sev-  
12 eral genes associated with the cytoskeleton (BORA, MZT1, PIBF1 and KLHL1)  
13 had a copy number gain in all progeny cell lines (**Table S2**). The DACH1 gene  
14 was also found amongst these genes, which has notably been shown to have an  
15 effect on cytoskeleton organization and to induce a more epithelial phenotype  
16 upon overexpression through the upregulation of E-cadherin (F. Zhao et al.,  
17 2015). In addition, BORA, MZT1 and DACH1 were found amongst the 329 genes  
18 commonly differentially expressed between all adherent and suspension cell  
19 lines (**Table S2**). Indeed, consensus gene expression changes associated with cy-  
20 toskeleton organization was observed between all progeny HEK293 cell lines  
21 and HEK293 in the overall analysis of transcription profiles (**Figure 3A**). Within  
22 the gained region of chromosome 18 common to all progeny cell lines except  
23 293E, there are several desmocollin and desmoglein genes (DSC1, DSC2, DSC3,  
24 DSG1, DSG2, DSG3 and DSG4) belonging to the cell-cell adhesion gene set  
25 (GO:0098609), which may render this region prone to gene copy number varia-  
26 tion. None of these genes were found amongst the commonly differentially ex-  
27 pressed genes between all progeny cell lines and HEK293 as may be expected  
28 since 293E had a loss of copy number in this region (**Table S4**). However, several  
29 of these genes (DSC2, DSC3 and DSG2) were found up-regulated in HEK293  
30 suspension cells compared to adherent cells (**Table S5**), suggesting that they  
31 play a role in the differences between adherent and suspension cell lines. The  
32 observed enrichment of cell adhesion GO-terms (GO:0007156 and GO:0098742)  
33 amongst genes with common high/moderate impact SNPs unique to progeny cell  
34 lines compared to HEK293 cells also supported common genomic alterations in  
35 progeny cell lines involved in cell adhesion. Combined with the observed down-  
36 regulation of the expression of cell adhesion genes in progeny cell lines com-  
37 pared to HEK293 (**Figure 3A**), results highlight changes in cell adhesion during  
38 continuous cultivation and cell line development of HEK293 cells.

39

40 Moreover, specific genomic regions of more local gain or loss of specific genes  
41 were observed, including a loss of fumarate hydratase (FH) gene copies. The loss  
42 of FH copies was previously observed for HEK293 by Lin and coworkers and was  
43 suggested to play an important part in the transformed phenotype of the cell line



1 (Y. C. Lin et al., 2014). In line with this, our results showed that several of the  
2 HEK293 progeny cell lines (293E, 293-F and Freestyle 293-F) was found to only  
3 maintain half the number of FH gene copies compared to the original HEK293  
4 (**Figure S2**), supporting an advantageous loss of the FH gene in the HEK293 cell  
5 lineages. Furthermore, a conserved pattern of substantial gain ( $>1.5$  log<sub>2</sub>-fold  
6 change) of the TLE4 gene and surrounding loci, including the non-coding RNA  
7 LINC01507, was observed for all progeny cells except 293E (**Figure S2**). This  
8 gene encodes the transducin-like enhancer protein 4, which is a transcriptional  
9 co-repressor of members of the Wnt signaling pathway. Down-regulation of this  
10 gene has been associated with the epithelial-to-mesenchymal transition (EMT)  
11 phenotype (Wu et al., 2016), consistent with the observation in this study that  
12 the original HEK293 strain seems to have a more mesenchymal expression pro-  
13 file than the other cell lines (**Figure S4**). Interestingly, TLE4 has previously been  
14 reported to have both a tumor suppressor function and to be associated with  
15 promoting tumor growth in different studies of different cancers (Shin et al.,  
16 2016)(Wang et al., 2016). Moreover, a significant loss of the ADAM3A pseudo-  
17 gene ( $<-1$  log<sub>2</sub>-fold change), which has previously been associated with different  
18 cancers (Barrow et al., 2011)(Liu et al., 2012), was observed in all progeny cell  
19 lines accept 293-H compared to HEK293 (**Figure S2**). The specific gain of TLE4  
20 and/or loss of ADAM3A loci and their association with tumor development, sug-  
21 gest important functions of these genes in the evolution of HEK293 cell lines.

22  
23 Taken together, the genomic and transcriptomic profiles of HEK293 and its  
24 progeny cell lines suggest common genomic and gene expression changes that  
25 have independently evolved in all the progeny cell lineages compared to the orig-  
26 inal HEK293, likely reflected in traits providing advantages during single cell iso-  
27 lation procedures. Such traits could be associated with for instance fast prolifera-  
28 tion and maintaining evasion of normal cell senescence. Moreover, genomic and  
29 transcriptomic traits associated with for instance cell adhesion, cell motility and  
30 extracellular matrix organization may very well be under a selective pressure  
31 during single cell cloning, potentially through altered expression of cell mem-  
32 brane proteins. Indeed, the parental HEK293 cell line is dividing slower and is  
33 more difficult to detach by trypsinization than the other adherent cell lines. It  
34 should however be noted that the assumption that there are independently  
35 evolved common changes in progeny cell lines compared to HEK293, relies on  
36 that the HEK293 cell line used as reference in this study (ATCC-CRL 1573) is ac-  
37 tually the very same cell line that has been used for the generation of each prog-  
38 eny cell line. If an older or newer version of HEK293 was used for subcloning of  
39 either progeny cell line, then the differences we see may be due to changes that  
40 occurred in this HEK293 strain only or in the process of adaptation. Due to lim-  
41 ited literature available on progeny cell line development, we cannot completely  
42 exclude this possibility. However, we hypothesize that this cell line is, if not the

1 same, at least highly similar to the HEK293 strain used for progeny cell line de-  
2 velopment.

3

#### 4 **Key differences between adherent and suspension progeny HEK293 cell** 5 **lines include changes in cell adhesion gene expression**

6 In bioproduction processes for pharmaceutical proteins, suspension cell lines  
7 enable large-scale cultivation in bioreactors, which is required in order to meet  
8 the demands for marketed drugs. However, the adaptation of cells from adherent  
9 to suspension growth and the differential cultivation procedures between ad-  
10 herent and suspension cells induces phenotypic changes to the cell lines. In order  
11 to develop a deeper understanding of such changes, we evaluated differences in  
12 gene expression levels between adherent and suspension progeny HEK293 cells.  
13 Consensus differential expression results were found related to up-regulation of  
14 genes associated with cell component organization such as membrane, cytoskel-  
15 eton and cell junction in suspension compared to adherent cells (**Figure 5A**).  
16 Moreover, significant changes were associated with cell adhesion, cell motility,  
17 cell morphogenesis and differentiation. Noteworthy, cell adhesion was found up-  
18 regulated in suspension progeny cell lines and when looking into the expression  
19 of the most significant differentially expressed genes (adjusted p-value <0.01)  
20 amongst the cell adhesion gene set (**Table S6**), there are several cell adhesion  
21 molecules (CAMs) found both up- and down-regulated in suspension cells com-  
22 pared to adherent. Remarkably, several members of the cadherin superfamily,  
23 including many different protocadherins (PCDH), desmoglein 2 (DSG2) and  
24 desmocollin 2 (DSC2) were found significantly up-regulated in suspension cells  
25 compared to adherent cells. This family of genes are involved in the formation of  
26 adherence junctions between cells (Bruner and Derksen, 2018). Interestingly,  
27 amongst the most significant differentially expressed genes within the cell adhe-  
28 sion gene set, four protocadherin members showed the highest fold-change of  
29 up-regulated genes in suspension cells compared to adherent (**Table S6**).  
30 Amongst other CAMs like integrins and Ig-superfamily cell adhesion molecules  
31 (IgSF CAMs) both significantly up- and down-regulated genes were observed be-  
32 tween adherent and suspension cell lines. The higher expression of such cell ad-  
33 hesion molecules in suspension cell lines compared to adherent progeny  
34 HEK293 cells may be explained by the loss of culture dish support to grow on in  
35 case of suspension cells. Upon disruption of adhesion interactions with other  
36 cells and extracellular matrix, a natural cellular response may be to increase or  
37 maintain the expression of adhesion molecules in an attempt to restore such  
38 connections. The ability of the suspension cell lines to form cell aggregates dur-  
39 ing suspension cultivation and the ease of the cells to attach to culture dish sur-  
40 faces upon cultivation without shaking, can be speculated to support these find-  
41 ings. Such cell adhesion molecules found up-regulated in suspension cell lines  
42 may thus be appropriate cell line engineering targets for improved bioprocess  
43 performance of suspension cell lines.

1

2 **Metabolic changes of the cholesterol biosynthesis may provide support for**  
3 **suspension growth in serum free medium**

4 Further evaluation of the differentially expressed genes between adherent and  
5 suspension HEK293 progeny cell lines, based on metabolic gene set analysis,  
6 highlighted metabolic differences between the cell lines. For instance, processes  
7 related to the biosynthesis of aromatic amino acids (tryptophan, phenylalanine  
8 and tyrosine) were down-regulated (**Figure 4B**) in suspension cells compared to  
9 adherent cells. Furthermore, other metabolic pathways with differences between  
10 suspension and adherent cell lines involved cholesterol biosynthesis and metab-  
11 olism, omega-3 and omega-6 fatty acid biosynthesis, fatty acid biosynthesis, de-  
12 saturation and elongation, retinol metabolism and linoleate metabolism (**Figure**  
13 **4B**). All of these pathways are related to lipids and/or cholesterol metabolic pro-  
14 cesses. These metabolic changes may be a result of different growth media com-  
15 positions used for the cultivation of either adherent or suspension cells that may  
16 imply different concentrations of for instance amino acids, glucose or serum.  
17 When reducing the number of differentially expressed genes to those that con-  
18 sistentlly showed differential expression between adherent and suspension cells  
19 in pairwise comparisons of all cell lines, the cholesterol and sterol biosynthesis  
20 and metabolism pathway were found to be most significantly different between  
21 the cell types (**Figure 5B**). As suspension cell lines are cultivated under serum  
22 free conditions, the increased expression of genes associated with for instance  
23 cholesterol in suspension cell lines may be a result of a lower cholesterol content  
24 in the medium. However, since cholesterol is a major component of the cell  
25 membrane and has an important function for membrane structure and cell sig-  
26 naling (Maxfield and Tabas, 2005) the differential expression of genes associated  
27 with cholesterol synthesis and metabolism may also be of importance for the dif-  
28 ferent morphologies between adherent and suspension HEK293 cells. Indeed,  
29 previous studies have shown that cholesterol plays a critical role in regulating  
30 the formation of cell-to-cell interactions in endothelial cells (Corvera et al., 2000)  
31 and that depletion of cholesterol reduces cell adhesion and increases endothelial  
32 cell stiffness (Byfield et al., 2004; Norman et al., 2010). Increased cell surface  
33 stiffness has been reported for HEK293 cells in suspension compared to adher-  
34 ent state as a result of up-regulation and re-organization of the actin cytoskele-  
35 ton (Haghparast et al., 2015). This may partly be a result of altered cholesterol  
36 levels in the cell membrane since cholesterol is a regulator of the actin cytoskele-  
37 ton and cholesterol depletion has been shown to induce actin polymerization (Qi  
38 et al., 2009). Three of the consistently up-regulated genes (MSMO1, HMGCS1 and  
39 IDI1) in suspension HEK293 compared to adherent encode enzymes that have  
40 direct roles in the cholesterol biosynthesis pathway (Mazein et al., 2013). Me-  
41 thylsterol monooxygenase 1 (MSMO1), an endoplasmatic reticulum transmem-  
42 brane protein, and hydroxymethylglutaryl-CoA synthase (HMGCS1), located in  
43 the cytoplasm, are catalyzing steps in the cholesterol synthesis pathway, where-

1 as isopentenyl-diphosphate delta-isomerase (IDI1) catalyze the isomerization of  
2 one the cholesterol building blocks, isopentenyl diphosphate. Moreover, two ad-  
3 ditional genes (NPC1L1 and INSIG1) found up-regulated in suspension cells  
4 compared to adherent, are also associated with cholesterol metabolism by vari-  
5 ous processes. The NPC1L1 gene encodes a transporter protein (NPC1-like intra-  
6 cellular cholesterol transporter 1) required for cholesterol absorption in the in-  
7 testine and is also suggested to play an important role in intracellular cholesterol  
8 trafficking between vesicles (Howles and Hui, 2012). Insulin-induced gene 1 pro-  
9 tein (INSIG1) is a negative regulator of cholesterol synthesis and important for  
10 cholesterol homeostasis (Dong et al., 2012) and knockout of INSIG1 has previ-  
11 ously been shown to result in cholesterol accumulation (Engelking et al., 2005).  
12 As this gene was found to be upregulated in suspension cells compared to adher-  
13 ent HEK293, this would have the reverse impact on the cholesterol biosynthesis  
14 pathway in suspension cells compared to the above-mentioned MSMO1, HMGCS1  
15 and IDI1 genes, leading to a reduction of the cholesterol content of the cell. Nota-  
16 bly, a lower cholesterol biosynthesis in suspension cell lines compared to the  
17 original HEK293 strain was indeed predicted using IPA (**Supplementary Figure**  
18 **7**). It should however be noted that this prediction does not take into considera-  
19 tion the effect of INSIG1, instead the predicted reduction in cholesterol biosyn-  
20 thesis in suspension cells compared to the HEK293 cell line is a result of down-  
21 regulation of SC5D (lathosterol oxidase).

22  
23 From the transcriptomic data of these different HEK293 cell lines, differences  
24 between adherent and suspension cells were found to be related to differences in  
25 the metabolism of lipids in general and cholesterol specifically. This emphasizes  
26 a potentially important role of cholesterol and lipid biosynthesis in the transition  
27 from adherent to serum free suspension growth of HEK293 cell types. From a  
28 bioprocess perspective, differences in intracellular cholesterol synthesis and me-  
29 tabolism are of interest with regards to the secretory capacity of a cell line since  
30 cholesterol content of a cell can impact its productivity. Previous findings has  
31 shown that cholesterol is essential for ER to Golgi transport within the secretory  
32 pathway (Ridsdale et al., 2006) and that secreted productivity of CHO cells in-  
33 creases upon elevated intracellular cholesterol levels, through silencing of  
34 INSIG1, possibly due to increasing the volume of the Golgi compartment (Loh et  
35 al., 2017). It would therefore be of interest to gain further knowledge about the  
36 cholesterol content and distribution within HEK293 cell lines and potentially  
37 evaluate if this this pathway can be a target for enhanced bioproductivity with-  
38 out having a deleterious impact on suspension growth or cell morphology.

39  
40 **Transcriptomic and genomic results indicated that suspension adaptation**  
41 **of HEK293 does not follow the epithelial to mesenchymal transition**

42 Moreover, 4 of the 38 genes (ID1, SMAD7, TXNIP and LOX) that were consistently  
43 differentially expressed between adherent and suspension HEK293 have previ-

1 ously been annotated to play a role in epithelial to mesenchymal transition  
2 (EMT) (Zhao et al., 2015), the event where stationary epithelial cells lose their  
3 cell-cell adhesion and change into motile and invasive mesenchymal cells (Yang  
4 and Weinberg, 2008). However, when evaluating the expression of common  
5 markers for mesenchymal and endothelial phenotypes as well as predicting the  
6 outcome of the EMT pathway using ingenuity pathway analysis (IPA), the paren-  
7 tal HEK293 strain showed the most mesenchymal-like phenotype whereas sus-  
8 pension cell lines were predicted to have reduced transition from epithelial to  
9 mesenchymal phenotype compared HEK293 (**Figure S4**). These results, along  
10 with above-mentioned details regarding copy number variation of the TLE4 and  
11 DACH1 genes, indicate that the suspension adaptation of HEK293 lineages does  
12 not follow the EMT pathway. However, suspension cells were predicted to have a  
13 higher degree of disruption of adherence junctions compared to the parental  
14 HEK293 strain (data not shown), which may be important for the suspension cell  
15 phenotype.

16

#### 17 **Identification of five genes with potential key roles in differences between** 18 **adherent and suspension human cell lines**

19 Altogether nine of the previously identified 38 genes (LOX, ID1, ADAMTS1, ZIC1,  
20 KCNMA1, DHRS3, RARG, COL4A6 and ARRDC4) were shown to have significantly  
21 different expression levels also in an extended validation of the genes in a set of  
22 63 human cell lines from the HPA database (Uhlen et al., 2017)(**Figure 6**). How-  
23 ever, in the case of four of the genes (ADAMTS1, KCNMA1, COL4A6 and ARRDC4)  
24 the direction of expression between adherent and suspension cells was reversed  
25 compared to the pairwise comparison of HEK293 cell lines only (**Figure 5B**). The  
26 remaining five genes (LOX, ID1, ZIC1, DHRS3 and RARG) showed a consistent ex-  
27 pression profile between adherent and suspension cells compared to the results  
28 presented in **Figure 5B**, suggesting a key role of these genes in the morphologies  
29 of adherent and suspension cells. ID1 belongs to the TGF-beta signaling pathway  
30 and up-regulation of this gene, as found in adherent cells compared to suspen-  
31 sion cell lines, has been associated with the mesenchymal-to-epithelial transition  
32 (ID1) (Stankic et al., 2013). Consistently, ID1 silencing has also been shown to  
33 significantly reduce adhesion of neural stem cells (Tan et al., 2012) and con-  
34 versely, increased ID1 expression in epithelial cells has been related to increased  
35 adhesion (Qiu et al., 2011). In addition, lysyl oxidase (LOX), an enzyme responsi-  
36 ble for the covalent cross-linking between elastin and collagen in the extracellu-  
37 lar matrix, has been shown to be important for cell-matrix adhesion formation,  
38 supporting the adherent phenotype of adherent cells but is also associated with  
39 cell invasion and induction of EMT (Payne et al., 2005)(Schietke et al., 2010). Be-  
40 sides the EMT-related genes, the additional three genes (RARG, DHRS3 and  
41 ZIC1), consistently up-regulated in adherent cells compared to suspension cell  
42 lines, have previously been associated with cell adhesion through the retinoic  
43 acid signaling pathway. Indeed, retinol metabolism was found to be down-

1 regulated in suspension cells also in the metabolic gene set analysis. The RARG  
2 gene, which is upregulated in adherent cells compared to suspension cells, en-  
3 codes the retinoic acid receptor gamma that controls the expression of genes in-  
4 volved in cell adhesion and plays an important role in promoting cell adhesion in  
5 mouse embryonic fibroblasts (Al Tanoury et al., 2013)(Kelley et al., 2017). Fur-  
6 thermore, the transcription factor ZIC1 has been associated with the upregula-  
7 tion of genes associated with retinoic acid signaling and adhesion (Cornish et al.,  
8 2009; Gan et al., 2011) whereas retinoic acid-inducible dehydrogenase reductase  
9 3 (DHRS3) is an enzyme important for retinoic acid homeostasis and acts a nega-  
10 tive regulator of retinoic acid synthesis. This enzyme has a weak catalytic ca-  
11 pacity to convert retinaldehyde to retinol, which results in reduced retinoic acid  
12 levels, unless co-expressed with RDH10, which induces the full capacity of the  
13 DHRS3 enzyme, resulting in decreased retinoic acid synthesis (Adams et al.,  
14 2014). Furthermore, signaling of retinoic acid receptors only in the absence ret-  
15 inoic acid is associated with increased adhesion in mouse embryonic fibroblasts  
16 (Al Tanoury et al., 2013). The level of RDH10, along with DHRS3, was significant-  
17 ly lower in the HEK293 suspension cells compared to adherent (**Table S5**), sug-  
18 gesting more efficient catalytic activity of the DHRS3 enzyme in the adherent cell  
19 lines, which may lead to retinoic acid signaling in the absence of retinoic acid,  
20 resulting in a more adherent phenotype in these cell lines.

21

## 22 **Conclusions**

23 Our study has outlined the genomic, transcriptomic and metabolomic variations  
24 between six industrially relevant HEK293 cell lines, in an attempt to improve the  
25 understanding of their respective differences in phenotype. We report a selective  
26 pressure to develop certain expression profiles during the evolution and contin-  
27 uous cultivation, evidenced by the numerous genes and pathways detailed here.  
28 The key common changes between HEK293 and its progeny cell lines involve in  
29 particular cell membrane proteins and processes related to cell adhesion, motili-  
30 ty and the organization of various cellular components such as the cytoskeleton  
31 and extracellular matrix. In addition, changes associated with differences be-  
32 tween adherent and suspension cell growth in particularly involve changes in  
33 cell adhesion protein expression, cholesterol metabolism and a set of six key  
34 genes (RARG, ID1, ZIC1, LOX and DHRS3) with potentially key roles in the differ-  
35 entiation between the two groups. These results could be of importance when  
36 pursuing further cell line engineering or bioprocess optimization of these and  
37 other human cell lines.

## 38 **Acknowledgements**

39 This work was supported by the Knut and Alice Wallenberg Foundation, Astra-  
40 Zeneca, SSF, Vinnova and the Novo Nordisk Foundation (grant no.  
41 NNF10CC1016517).

## 1 **Author Contributions**

2 Conceptualization, R.F., P.V., M.U., J.N., and J.R.; Methodology, M.M., R.S. and J.R.  
3 Formal analysis, M.M., R.S., and M.L.; Investigation, M.M., R.S., and M.L.; Writing  
4 – Original Draft, M.M, R.S., M.L., and J.R.; Writing – Review & Editing, M.M.,  
5 M.L., D.H., J.N., and J.R.; Visualization, M.M., R.S., and M.L., Supervision, R.F.,  
6 P.V., D.H., T.S., M.U., J.N., and J.R., Funding Acquisition, R.F., P.V., M.U. J.N, and  
7 J.R.

## 8 **Declaration of interests**

9 The authors declare no competing interests  
10

## 1 Figures

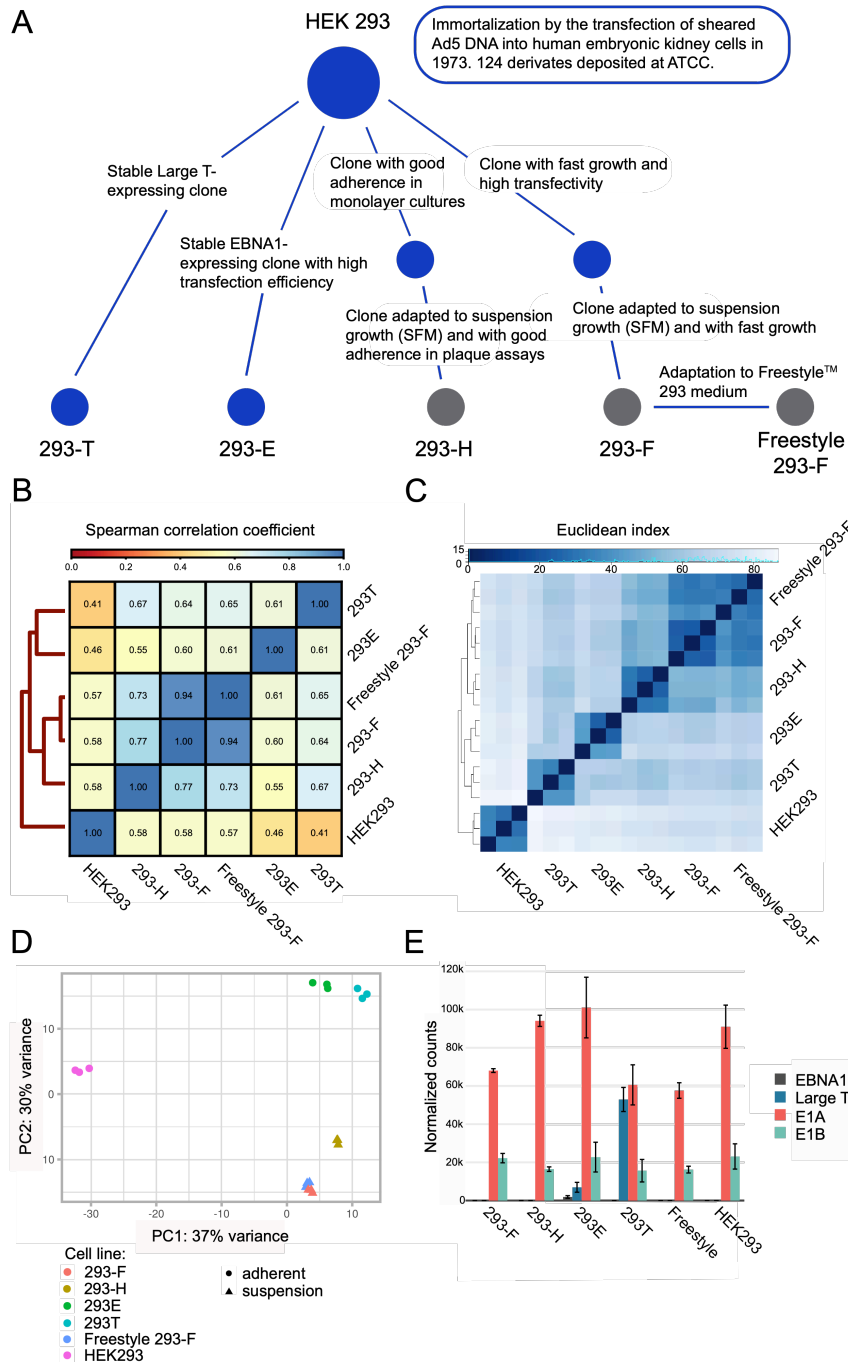

2  
3 **Figure 1. Comparisons of genomic and transcriptomic profiles of HEK293**  
4 **cells showed taxonomic divergence between parental HEK293 and progeny**  
5 **cell lines.**

6 (A) A schematic overview of the lineage relationship of the six HEK293 cell lines  
7 used in this study. Blue dots represent adherent cells whereas grey dots repre-  
8 sent suspension cell lines. (B) Genomic comparison between HEK293 cell lines  
9 based on Spearman correlation coefficients of read counts. Darker blue color in-  
10 dicates higher correlation. (C) Sample-to-sample comparison between transcrip-  
11 tomes illustrated by a heatmap and hierarchical clustering of taxonomical diver-  
12 gence between samples. Darker blue color indicates shorter Euclidean distance  
13 between samples and more similarity. (D) PCA plot showing the separation in



1 expression pattern between samples. (E) RNA expression levels of stably inte-  
2 grated viral genes (EBNA-1, Large T, E1A and E1B) in various HEK293 cell line-  
3 ages determined by RNA sequencing.  
4

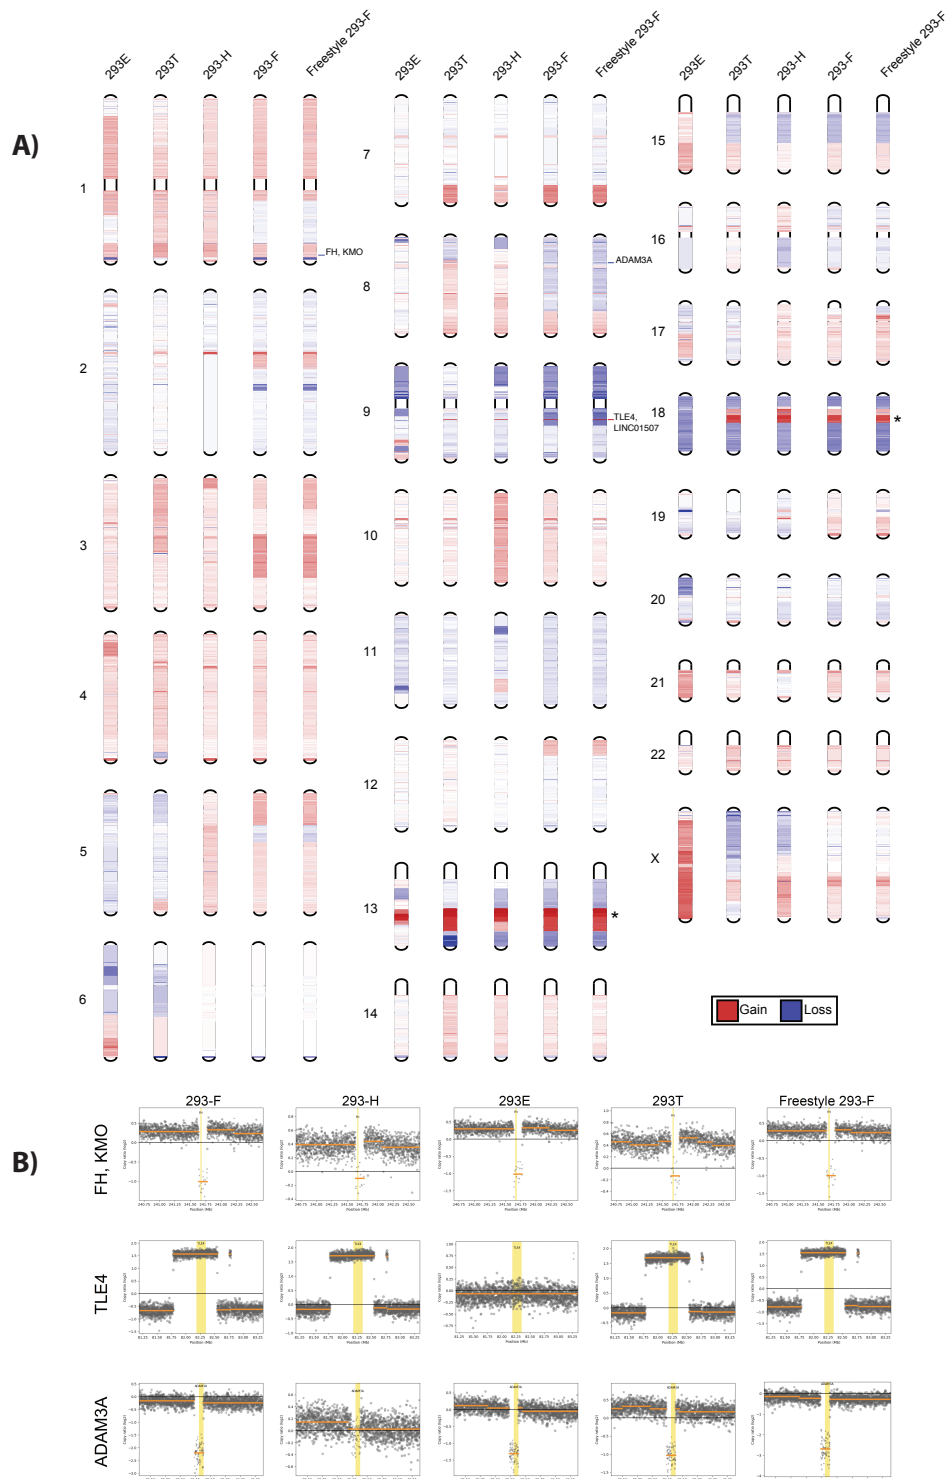

1  
 2 **Figure 2. Copy number variation analysis of HEK293 progeny cells com-**  
 3 **pared to the parental HEK293 revealed conserved patterns of copy number**  
 4 **gain and loss. A) Copy number gain (red) or loss (blue) over all chromosomes of**  
 5 **progeny HEK293 cell lines. The color intensiveness correspond to log2 fold-**  
 6 **change compared to HEK293 cells. The asterix symbol (\*) marks regions of**  
 7 **common copy number gain (>1 log2 fold change) common between several**  
 8 **progeny HEK293 cell lines on chromosome 13 and 18. Identified genes with local**

1 copy number gain or loss of the full gene sequence common between several  
2 HEK293 progeny cell lines are marked with the gene name. B) Copy number gain  
3 or loss (log<sub>2</sub> fold change compared to HEK293 for each cell line of the FH,  
4 KMO, TLE4 and ADAM3A genes.  
5

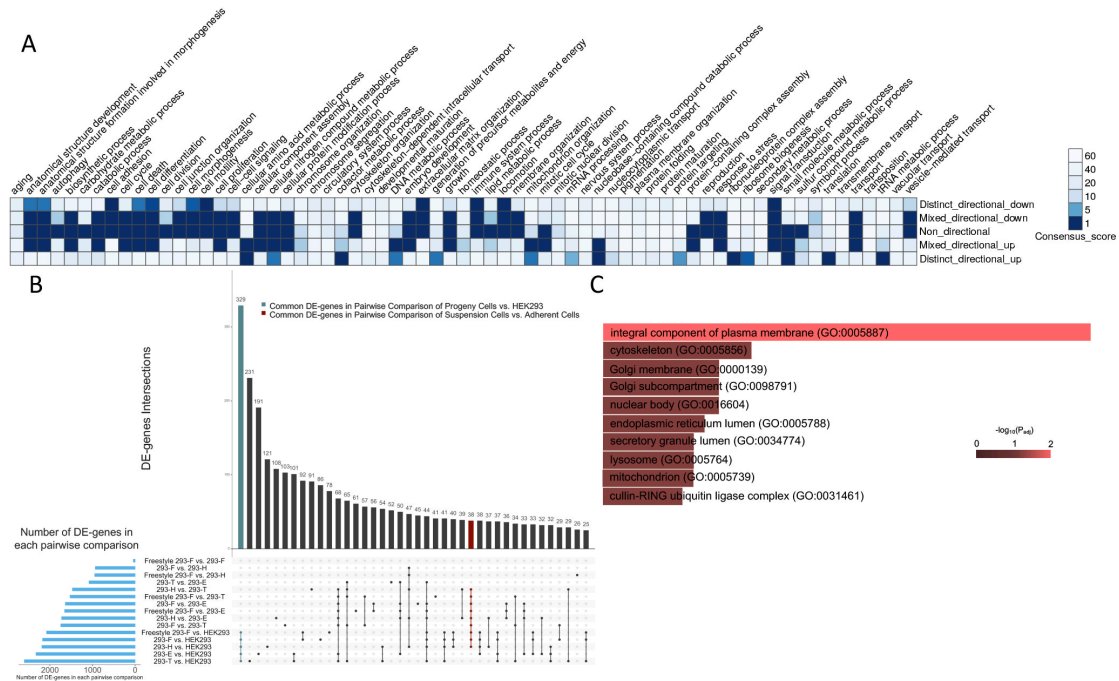

1  
2 **Figure 3. Differential expression analysis emphasized processes and genes**  
3 **with common changes in all progeny cell lines compared to the parental**  
4 **HEK293**  
5 (A) Consensus heatmap of GO biological processes with a different expression  
6 pattern between progeny cell lines compared to the parental HEK293 (B) Com-  
7 mon differentially expressed (DE) genes in pairwise comparisons of all HEK293  
8 cells. Blue bars show number of DE genes in each pairwise comparison. Green  
9 bar shows 329 common DE genes in pairwise comparisons of progeny with  
10 HEK293 parental cells. Red bar shows common 38 DE genes in the comparison of  
11 suspension cells against adherent cells. (C) Top ten significant GO cellular com-  
12 ponents of the 329 common DE genes in pairwise comparisons between progeny  
13 cells and HEK293.  
14



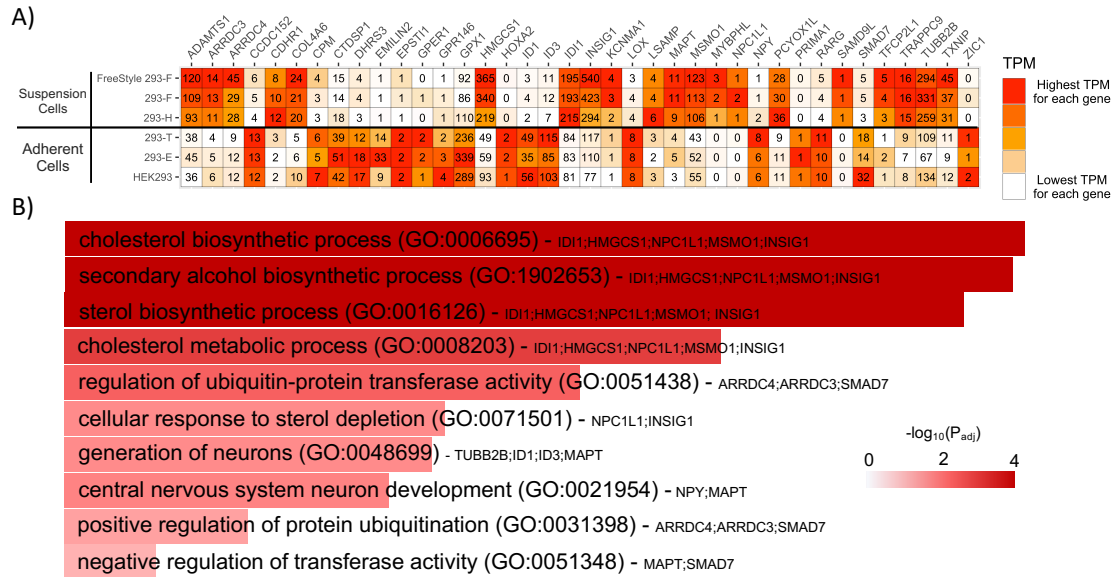

1  
2 **Figure 5. Pairwise comparison of transcription data identified cholesterol**  
3 **biosynthesis as the main enriched pathway between adherent and suspen-**  
4 **sion HEK293 cells.**  
5 (A) Heat map with TPM values for each DE gene common to all adherent to sus-  
6 pension comparisons. (B) The top ten most enriched biological GO terms of the  
7 38 common DE genes between adherent and suspension cells based on gene en-  
8 richment analysis. Length and color of bars both show significance of adjusted p-  
9 value for the hypergeometric test. Also, genes mentioned in each bar are the  
10 genes that belong to enriched GO term and present in the list of 38 DE genes.  
11

1

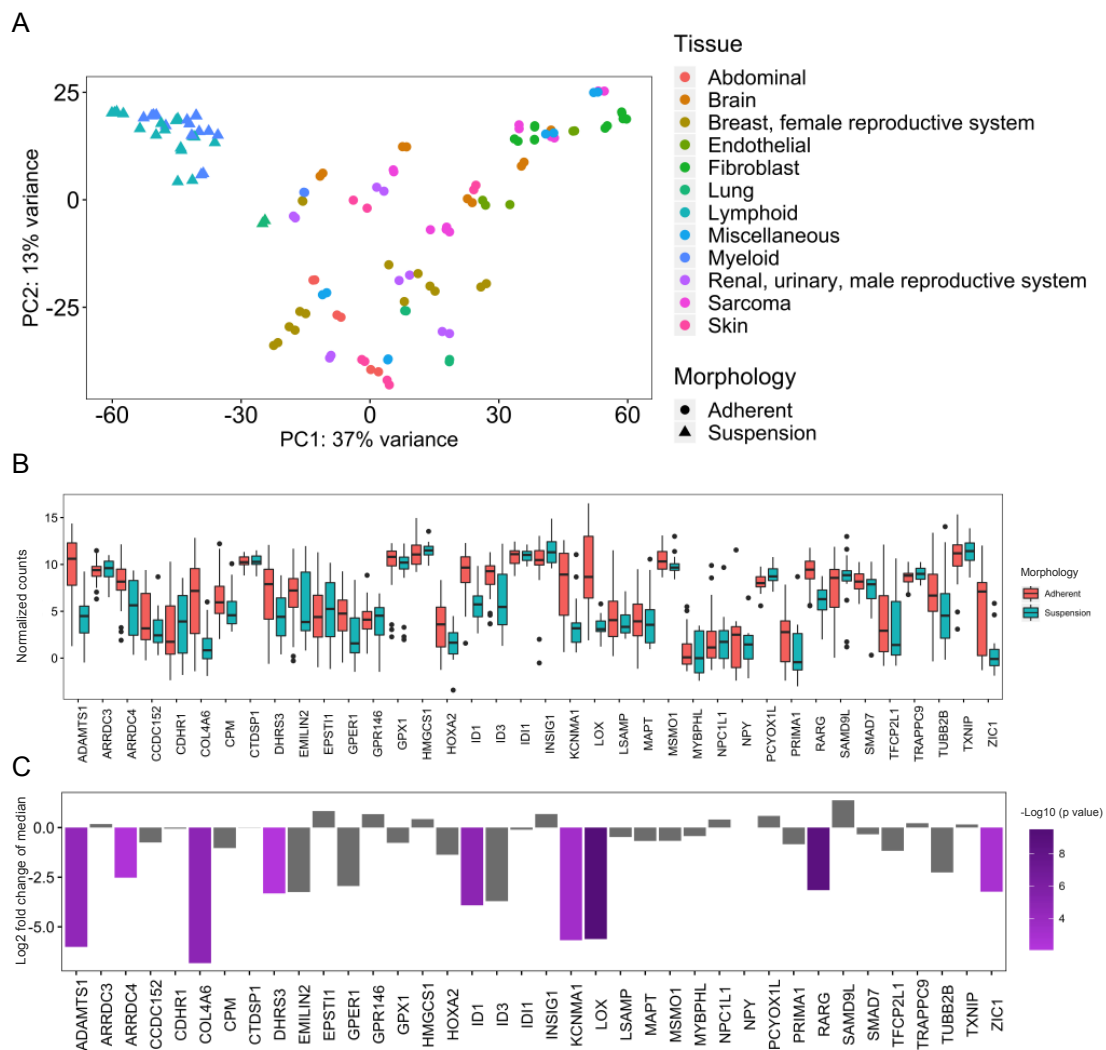

2  
3 **Figure 6. Gene expression validation of 38 previously identified differentially**  
4 **expressed genes in 63 human cell lines, identified nine significantly**  
5 **differentially expressed genes between suspension and adherent cell lines.**

6 (A) PCA transcriptomic data of 63 human cell-lines from the Human Protein Atlas shows a clear separation of suspension and adherent cell lines from different  
7 tissues. (B) Range of normalized counts in HPA cell lines for each of the previously  
8 identified 38 genes, differentially expressed between all adherent and suspension  
9 HEK293 cell lines. The black line in each box shows median of normalized  
10 counts for the gene. (C) Genes that are differentially expressed between adherent  
11 and suspension cells using a Mann-Whitney U-test, with p-values <0.01, are high-  
12 lighted in purple, where length of bars shows logarithmic fold change of median  
13 between two groups and the color of bars denotes degree of significance of p-  
14 value. Non-significant genes have gray bars.  
15  
16

- 1 Table S1. Transcriptomic data (TPM values) of all genes in six HEK293 cell lines  
2  
3 Table S2. Genes with full or partial copy number gain or loss ( $>1$ / $<-1$  log<sub>2</sub> fold-  
4 change) in HEK293 progeny cell lines compared to the parental HEK293. Related  
5 to Figure 2.  
6  
7 Table S3. High and moderate impact SNPs common and unique to all progeny cell  
8 lines compared to the parental HEK293.  
9  
10 Table S4. Results of differential expression analysis between progeny cell lines  
11 compared to HEK293 and intersects between results. Related to Figure 3 and  
12 Figure 5.  
13  
14 Table S5. Results of differential expression analysis between suspension and ad-  
15 herent progeny HEK293 cell lines. Related to Figure 4.  
16  
17 Table S6. List of differentially expressed genes ( $p_{adj} < 0.01$ ) in suspension com-  
18 pared to adherent HEK293 cell line. Related to Figure 4.  
19  
20 Table S7. Full results of metabolic gene set analysis. Related to Figure 4.  
21  
22 Table S8. Normalized counts of 38 differentially expressed genes between sus-  
23 pension and adherent HEK293 cell lines in HPA cell lines. Related to Figure 6  
24



## 1 **References**

- 2 Adams, M.K., Belyaeva, O. V, Wu, L., Kedishvili, N.Y., 2014. The retinaldehyde  
3 reductase activity of dhcr3 is reciprocally activated by retinol  
4 dehydrogenase 10 to control retinoid homeostasis. *J. Biol. Chem.* 289,  
5 14868–14880. doi:10.1074/jbc.M114.552257
- 6 Al Tanoury, Z., Piskunov, A., Andriamoratsiresy, D., Gaouar, S., Lutzinger, R., Ye, T.,  
7 Jost, B., Keime, C., Rochette-Egly, C., 2013. Genes involved in cell adhesion  
8 and signaling: a new repertoire of retinoic acid receptor target genes in  
9 mouse embryonic fibroblasts. *J. Cell Sci.* 127, 521–533.  
10 doi:10.1242/jcs.131946
- 11 Alex Philippidis, 2017. The Top 15 Best-Selling Drugs of 2016 | The Lists | GEN  
12 [WWW Document].
- 13 Bandaranayake, A.D., Almo, S.C., 2014. Recent advances in mammalian protein  
14 production. *FEBS Lett.* 588, 253–60. doi:10.1016/j.febslet.2013.11.035
- 15 Barrow, J., Adamowicz-Brice, M., Cartmill, M., MacArthur, D., Lowe, J., Robson, K.,  
16 Brundler, M.A., Walker, D.A., Coyle, B., Grundy, R., 2011. Homozygous loss of  
17 ADAM3A revealed by genome-wide analysis of pediatric high-grade glioma  
18 and diffuse intrinsic pontine gliomas. *Neuro. Oncol.* 13, 212–222.  
19 doi:10.1093/neuonc/noq158
- 20 Becker, J., Timmermann, C., Jakobi, T., Rupp, O., Szczepanowski, R., Hackl, M.,  
21 Goesmann, A., Tauch, A., Borth, N., Grillari, J., Pühler, A., Noll, T., Brinkrolf, K.,  
22 2011. Next-generation sequencing of the CHO cell transcriptome. *BMC Proc.*  
23 5 Suppl 8, P6. doi:10.1186/1753-6561-5-S8-P6
- 24 Berk, A.J., 2005. Recent lessons in gene expression, cell cycle control and cell  
25 biology from adenovirus. *Oncogene* 24, 7673–7685.  
26 doi:10.1038/sj.onc.1209040
- 27 Birzele, F., Schaub, J., Rust, W., Clemens, C., Baum, P., Kaufmann, H., Weith, A.,  
28 Schulz, T.W., Hildebrandt, T., 2010. Into the unknown: expression profiling  
29 without genome sequence information in CHO by next generation  
30 sequencing. *Nucleic Acids Res.* 38, 3999–4010. doi:10.1093/nar/gkq116
- 31 Bray, N.L., Pimentel, H., Melsted, P., Pachter, L., 2016. Near-optimal probabilistic  
32 RNA-seq quantification. *Nat. Biotechnol.* 34, 525–527. doi:10.1038/nbt.3519
- 33 Brinkrolf, K., Rupp, O., Laux, H., Kollin, F., Ernst, W., Linke, B., Kofler, R., Romand,  
34 S., Hesse, F., Budach, W.E., Galosy, S., Müller, D., Noll, T., Wienberg, J., Jostock,  
35 T., Leonard, M., Grillari, J., Tauch, A., Goesmann, A., Helk, B., Mott, J.E., Pühler,  
36 A., Borth, N., 2013. Chinese hamster genome sequenced from sorted  
37 chromosomes. *Nat. Biotechnol.* 31, 694–695. doi:10.1038/nbt.2645
- 38 Bruner, H.C., Derksen, P.W.B., 2018. Loss of E-cadherin-dependent cell–cell  
39 adhesion and the development and progression of cancer. *Cold Spring Harb.*  
40 *Perspect. Biol.* doi:10.1101/cshperspect.a029330
- 41 Byfield, F.J., Aranda-Espinoza, H., Romanenko, V.G., Rothblat, G.H., Levitan, I.,  
42 2004. Cholesterol depletion increases membrane stiffness of aortic  
43 endothelial cells. *Biophys. J.* 87, 3336–3343.  
44 doi:10.1529/biophysj.104.040634
- 45 Bylund, L., Kytölä, S., Lui, W.-O., Larsson, C., Weber, G., 2004. Analysis of the  
46 cytogenetic stability of the human embryonal kidney cell line 293 by  
47 cytogenetic and STR profiling approaches. *Cytogenet. Genome Res.* 106, 28–  
48 32. doi:10.1159/000078556
- 49 Chen, E.Y., Tan, C.M., Kou, Y., Duan, Q., Wang, Z., Meirelles, G., Clark, N.R., Ma'ayan,

- 1 A., 2013. Enrichr: interactive and collaborative HTML5 gene list enrichment  
2 analysis tool. *BMC Bioinformatics* 14, 128. doi:10.1186/1471-2105-14-128
- 3 Clément, N., Grieger, J.C., 2016. Manufacturing of recombinant adeno-associated  
4 viral vectors for clinical trials. *Mol. Ther. Methods Clin. Dev.* 3, 16002.  
5 doi:10.1038/mtm.2016.2
- 6 Cornish, E.J., Hassan, S.M., Martin, J.D., Li, S., Merzdorf, C.S., 2009. A microarray  
7 screen for direct targets of ZIC1 identifies an aquaporin gene, *aqp-3b*,  
8 expressed in the neural folds. *Dev. Dyn.* 238, 1179–1194.  
9 doi:10.1002/dvdy.21953
- 10 Corvera, S., DiBonaventura, C., Shpetner, H.S., 2000. Cell confluence-dependent  
11 remodeling of endothelial membranes mediated by cholesterol. *J. Biol.*  
12 *Chem.* 275, 31414–31421. doi:10.1074/jbc.M001708200
- 13 Côté, J., Garnier, A., Massie, B., Kamen, A., 1998. Serum-free production of  
14 recombinant proteins and adenoviral vectors by 293SF-3F6 cells.  
15 *Biotechnol. Bioeng.* 59, 567–575. doi:10.1002/(SICI)1097-  
16 0290(19980905)59:5<567::AID-BIT6>3.0.CO;2-8
- 17 Dietmair, S., Hodson, M.P., Quek, L.E., Timmins, N.E., Chrysanthopoulos, P., Jacob,  
18 S.S., Gray, P., Nielsen, L.K., 2012. Metabolite profiling of CHO cells with  
19 different growth characteristics. *Biotechnol. Bioeng.* 109, 1404–1414.  
20 doi:10.1002/bit.24496
- 21 Dong, X.Y., Tang, S.Q., Chen, J.D., 2012. Dual functions of Insig proteins in  
22 cholesterol homeostasis. *Lipids Health Dis.* doi:10.1186/1476-511X-11-173
- 23 DuBridge, R.B., Tang, P., Hsia, H.C., Leong, P.M., Miller, J.H., Calos, M.P., 1987.  
24 Analysis of mutation in human cells by using an Epstein-Barr virus shuttle  
25 system. *Mol. Cell. Biol.* 7, 379–87.
- 26 Dumont, J., Ewart, D., Mei, B., Estes, S., Kshirsagar, R., 2016. Human cell lines for  
27 biopharmaceutical manufacturing: history, status, and future perspectives,  
28 *Critical Reviews in Biotechnology.* Taylor & Francis.  
29 doi:10.3109/07388551.2015.1084266
- 30 Durocher, Y., Perret, S., Kamen, A., 2002. High-level and high-throughput  
31 recombinant protein production by transient transfection of suspension-  
32 growing human 293-EBNA1 cells. *Nucleic Acids Res.* 30, E9.
- 33 Engelking, L.J., Liang, G., Hammer, R.E., Takaishi, K., Kuriyama, H., Evers, B.M., Li,  
34 W.P., Horton, J.D., Goldstein, J.L., Brown, M.S., 2005. Schoenheimer effect  
35 explained - Feedback regulation of cholesterol synthesis in mice mediated  
36 by Insig proteins. *J. Clin. Invest.* 115, 2489–2498. doi:10.1172/JCI25614
- 37 Foxman, B., 2011. Omics Analyses in Molecular Epidemiologic Studies, in:  
38 *Molecular Tools and Infectious Disease Epidemiology.* Academic Press, pp.  
39 99–116. doi:10.1016/b978-0-12-374133-2.00007-1
- 40 Gan, L., Chen, S., Zhong, J., Wang, X., Lam, E.K.Y., 2011. ZIC1 Is Downregulated  
41 through Promoter Hypermethylation, and Functions as a Tumor Suppressor  
42 Gene in Colorectal Cancer. *PLoS One* 6, 16916.  
43 doi:10.1371/journal.pone.0016916
- 44 Garnier, A., Côté, J., Nadeau, I., Kamen, A., Massie, B., 1994. Scale-up of the  
45 adenovirus expression system for the production of recombinant protein in  
46 human 293S cells. *Cytotechnology* 15, 145–55.
- 47 Graham, F.L., 1987. Growth of 293 Cells in Suspension Culture. *J. Gen. Virol.* 68,  
48 937–940. doi:10.1099/0022-1317-68-3-937
- 49 Graham, F.L., Smiley, J., Russell, W.C., Nairn, R., 1977. Characteristics of a Human

- 1 Cell Line Transformed by DNA from Human Adenovirus Type 5. *J. gen. Virol*  
2 36, 59–7. doi:10.1099/0022-1317-36-1-59
- 3 Haghparast, S.M.A., Kihara, T., Miyake, J., 2015. Distinct mechanical behavior of  
4 HEK293 cells in adherent and suspended states. *PeerJ* 3, e1131.  
5 doi:10.7717/peerj.1131
- 6 Hammond, S., Swanberg, J.C., Kaplarevic, M., Lee, K.H., 2011. Genomic sequencing  
7 and analysis of a Chinese hamster ovary cell line using Illumina sequencing  
8 technology. *BMC Genomics* 12, 67. doi:10.1186/1471-2164-12-67
- 9 Howles, P.N., Hui, D.Y., 2012. Physiological role of hepatic NPC1L1 in human  
10 cholesterol and lipoprotein metabolism: New perspectives and open  
11 questions. *J. Lipid Res.* 53, 2253–2255. doi:10.1194/jlr.e031823
- 12 Kelley, M.D., Phomakay, R., Lee, M., Niedzwiedz, V., Mayo, R., 2017. Retinoic acid  
13 receptor gamma impacts cellular adhesion, Alpha5Beta1 integrin expression  
14 and proliferation in K562 cells. *PLoS One* 12, e0178116.  
15 doi:10.1371/journal.pone.0178116
- 16 Kildegaard, H.F., Baycin-Hizal, D., Lewis, N.E., Betenbaugh, M.J., 2013. The  
17 emerging CHO systems biology era: harnessing the ‘omics revolution for  
18 biotechnology. *Curr. Opin. Biotechnol.* 24, 1102–1107.  
19 doi:10.1016/J.COPBIO.2013.02.007
- 20 Kuleshov, M. V., Jones, M.R., Rouillard, A.D., Fernandez, N.F., Duan, Q., Wang, Z.,  
21 Koplev, S., Jenkins, S.L., Jagodnik, K.M., Lachmann, A., McDermott, M.G.,  
22 Monteiro, C.D., Gundersen, G.W., Ma’ayan, A., 2016. Enrichr: a  
23 comprehensive gene set enrichment analysis web server 2016 update.  
24 *Nucleic Acids Res.* 44, W90–W97. doi:10.1093/nar/gkw377
- 25 Lalonde, M.-E.E., Durocher, Y., 2017. Therapeutic glycoprotein production in  
26 mammalian cells. *J. Biotechnol.* 251, 128–140.  
27 doi:10.1016/j.jbiotec.2017.04.028
- 28 Leader, B., Baca, Q.J., Golan, D.E., 2008. Protein therapeutics: a summary and  
29 pharmacological classification. *Nat. Rev. Drug Discov.* 7, 21–39.  
30 doi:10.1038/nrd2399
- 31 Lee, J.S., Kallehauge, T.B., Pedersen, L.E., Kildegaard, H.F., Joung, J.K., 2015. Site-  
32 specific integration in CHO cells mediated by CRISPR/Cas9 and homology-  
33 directed DNA repair pathway. *Sci. Rep.* 5, 8572. doi:10.1038/srep08572
- 34 Lin, Y.-C., Boone, M., Meuris, L., Lemmens, I., Roy, N. Van, Soete, A., 2014. Genome  
35 dynamics of the human embryonic kidney 293 lineage in response to cell  
36 biology manipulations. *Joke Reumers* 9101013101.  
37 doi:10.1038/ncomms5767
- 38 Lin, Y.C., Boone, M., Meuris, L., Lemmens, I., Van Roy, N., Soete, A., Reumers, J.,  
39 Moisse, M., Plaisance, S., Drmanac, R., Chen, J., Speleman, F., Lambrechts, D.,  
40 Van De Peer, Y., Tavernier, J., Callewaert, N., 2014. Genome dynamics of the  
41 human embryonic kidney 293 lineage in response to cell biology  
42 manipulations. *Nat. Commun.* 5, 4767. doi:10.1038/ncomms5767
- 43 Liu, J., Lee, W., Jiang, Z., Chen, Z., Jhunhunwala, S., Haverty, P.M., Gnad, F., Guan,  
44 Y., Gilbert, H.N., Stinson, J., Klijn, C., Guillory, J., Bhatt, D., Vartanian, S.,  
45 Walter, K., Chan, J., Holcomb, T., Dijkgraaf, P., Johnson, S., Koeman, J., Minna,  
46 J.D., Gazdar, A.F., Stern, H.M., Hoefflich, K.P., Wu, T.D., Settleman, J., De  
47 Sauvage, F.J., Gentleman, R.C., Neve, R.M., Stokoe, D., Modrusan, Z., Seshagiri,  
48 S., Shames, D.S., Zhang, Z., 2012. Genome and transcriptome sequencing of  
49 lung cancers reveal diverse mutational and splicing events. *Genome Res.* 22,

- 1 2315–2327. doi:10.1101/gr.140988.112
- 2 Loh, W.P., Yang, Y., Lam, K.P., 2017. miR-92a enhances recombinant protein  
3 productivity in CHO cells by increasing intracellular cholesterol levels.  
4 *Biotechnol. J.* 12, 1600488. doi:10.1002/biot.201600488
- 5 Louis, N., Eveleigh, C., Graham, F.L., 1997. Cloning and Sequencing of the Cellular-  
6 Viral Junctions from the Human Adenovirus Type 5 Transformed 293 Cell  
7 Line. *Virology* 233, 423–429. doi:10.1006/viro.1997.8597
- 8 Mardinoglu, A., Agren, R., Kampf, C., Asplund, A., Uhlen, M., Nielsen, J., 2014.  
9 Genome-scale metabolic modelling of hepatocytes reveals serine deficiency  
10 in patients with non-alcoholic fatty liver disease. *Nat. Commun.* 5, 3083.  
11 doi:10.1038/ncomms4083
- 12 Maxfield, F.R., Tabas, I., 2005. Role of cholesterol and lipid organization in  
13 disease. *Nature*. doi:10.1038/nature04399
- 14 Mazein, A., Watterson, S., Hsieh, W.Y., Griffiths, W.J., Ghazal, P., 2013. A  
15 comprehensive machine-readable view of the mammalian cholesterol  
16 biosynthesis pathway. *Biochem. Pharmacol.* 86, 56–66.  
17 doi:10.1016/j.bcp.2013.03.021
- 18 Mootha, V.K., Lindgren, C.M., Eriksson, K.-F., Subramanian, A., Sihag, S., Lehar, J.,  
19 Puigserver, P., Carlsson, E., Ridderstråle, M., Laurila, E., Houstis, N., Daly, M.J.,  
20 Patterson, N., Mesirov, J.P., Golub, T.R., Tamayo, P., Spiegelman, B., Lander,  
21 E.S., Hirschhorn, J.N., Altshuler, D., Groop, L.C., 2003. PGC-1 $\alpha$ -responsive  
22 genes involved in oxidative phosphorylation are coordinately  
23 downregulated in human diabetes. *Nat. Genet.* 34, 267–273.  
24 doi:10.1038/ng1180
- 25 Murphy, A.J.M., Kung, A.L., Swirski, R.A., Schimke, R.T., 1992. cDNA expression  
26 cloning in human cells using the p $\lambda$ DR2 episomal vector system. *Methods* 4,  
27 111–131. doi:10.1016/1046-2023(92)90044-9
- 28 Norman, L.L., Oetama, R.J., Dembo, M., Byfield, F., Hammer, D.A., Levitan, I.,  
29 Aranda-Espinoza, H., 2010. Modification of cellular cholesterol content  
30 affects traction force, adhesion and cell spreading. *Cell. Mol. Bioeng.* 3, 151–  
31 162. doi:10.1007/s12195-010-0119-x
- 32 Payne, S.L., Fogelgren, B., Hess, A.R., Seftor, E.A., Wiley, E.L., Fong, S.F.T., Csiszar,  
33 K., Hendrix, M.J.C., Kirschmann, D.A., 2005. Lysyl oxidase regulates breast  
34 cancer cell migration and adhesion through a hydrogen peroxide-mediated  
35 mechanism. *Cancer Res.* 65, 11429–11436. doi:10.1158/0008-5472.CAN-  
36 05-1274
- 37 Priola, J.J., Calzadilla, N., Baumann, M., Borth, N., Tate, C.G., Betenbaugh, M.J.,  
38 2016. High-throughput screening and selection of mammalian cells for  
39 enhanced protein production, *Biotechnology Journal*. WILEY - VCH Verlag.  
40 doi:10.1002/biot.201500579
- 41 Qi, M., Liu, Y., Freeman, M.R., Solomon, K.R., 2009. Cholesterol-regulated stress  
42 fiber formation. *J. Cell. Biochem.* 106, 1031–1040. doi:10.1002/jcb.22081
- 43 Qiu, J., Wang, G., Peng, Q., Hu, J., Luo, X., Zheng, Y., Teng, Y., Tang, C., 2011. Id1  
44 induces tubulogenesis by regulating endothelial cell adhesion and  
45 cytoskeletal organization through  $\beta$ 1-integrin and Rho-kinase signalling. *Int.*  
46 *J. Mol. Med.* 28, 543–548. doi:10.3892/ijmm.2011.741
- 47 Ridsdale, A., Denis, M., Gougeon, P.-Y., Ngsee, J.K., Presley, J.F., Zha, X., 2006.  
48 Cholesterol is required for efficient endoplasmic reticulum-to-Golgi  
49 transport of secretory membrane proteins. *Mol. Biol. Cell* 17, 1593–605.

- 1       doi:10.1091/mbc.e05-02-0100  
2       Sanchez-Garcia, L., Martín, L., Mangués, R., Ferrer-Miralles, N., Vázquez, E.,  
3       Villaverde, A., 2016. Recombinant pharmaceuticals from microbial cells: a  
4       2015 update. *Microb. Cell Fact.* 15, 33. doi:10.1186/s12934-016-0437-3  
5       Schietke, R., Warnecke, C., Wacker, I., Schödel, J., Mole, D.R., Campean, V., Amann,  
6       K., Goppelt-Struebe, M., Behrens, J., Eckardt, K.U., Wiesener, M.S., 2010. The  
7       lysyl oxidases LOX and LOXL2 are necessary and sufficient to repress E-  
8       cadherin in Hypoxia: Insights into cellular transformation processes  
9       mediated by HIF-1. *J. Biol. Chem.* 285, 6658–6669.  
10      doi:10.1074/jbc.M109.042424  
11      Sellick, C.A., Croxford, A.S., Maqsood, A.R., Stephens, G., Westerhoff, H. V.,  
12      Goodacre, R., Dickson, A.J., 2011. Metabolite profiling of recombinant CHO  
13      cells: Designing tailored feeding regimes that enhance recombinant  
14      antibody production. *Biotechnol. Bioeng.* 108, 3025–3031.  
15      doi:10.1002/bit.23269  
16      Shaw, G., Morse, S., Ararat, M., Graham, F.L., 2002. Preferential transformation of  
17      human neuronal cells by human adenoviruses and the origin of HEK 293  
18      cells. *FASEB J.* 16, 869–871. doi:10.1096/fj.01-0995fje  
19      Shin, T.H., Brynczka, C., Dayyani, F., Rivera, M.N., Sweetser, D.A., 2016. TLE4  
20      regulation of wnt-mediated inflammation underlies its role as a tumor  
21      suppressor in myeloid leukemia. *Leuk. Res.* 48, 46–56.  
22      doi:10.1016/j.leukres.2016.07.002  
23      Soneson, C., Love, M.I., Robinson, M.D., 2015. Differential analyses for RNA-seq:  
24      transcript-level estimates improve gene-level inferences. *F1000Research* 4,  
25      1521. doi:10.12688/f1000research.7563.1  
26      Stankic, M., Pavlovic, S., Chin, Y., Brogi, E., Padua, D., Norton, L., Massagué, J.,  
27      Benezra, R., 2013. TGF- $\beta$ -Id1 signaling opposes twist1 and promotes  
28      metastatic colonization via a mesenchymal-to-epithelial transition. *Cell Rep.*  
29      5, 1228–1242. doi:10.1016/j.celrep.2013.11.014  
30      Stepanenko, A. A., Dmitrenko, V. V., 2015. HEK293 in cell biology and cancer  
31      research: Phenotype, karyotype, tumorigenicity, and stress-induced  
32      genome-phenotype evolution. *Gene.* doi:10.1016/j.gene.2015.05.065  
33      Stepanenko, A.A., Dmitrenko, V.V., 2015. HEK293 in cell biology and cancer  
34      research: phenotype, karyotype, tumorigenicity, and stress-induced  
35      genome-phenotype evolution. *Gene* 569, 182–190.  
36      doi:10.1016/j.gene.2015.05.065  
37      Swirski, R.A., Van Den Berg, D., Murphy, A.J.M., Lambert, C.M., Friedberg, E.C.,  
38      Schimke, R.T., 1992. Improvements in the Epstein-Barr-based shuttle vector  
39      system for direct cloning in human tissue culture cells. *Methods* 4, 133–142.  
40      doi:10.1016/1046-2023(92)90045-A  
41      Tan, R., Lee, Y.J., Chen, X., 2012. Id-1 plays a key role in cell adhesion in neural  
42      stem cells through the preservation of RAP1 signaling. *Cell Adhes. Migr.*  
43      doi:10.4161/cam.19809  
44      Tang, Y., Liu, Z., Zhao, L., Clemens, T.L., Cao, X., 2008. Smad7 stabilizes  $\beta$ -catenin  
45      binding to E-cadherin complex and promotes cell-cell adhesion. *J. Biol.*  
46      *Chem.* 283, 23956–23963. doi:10.1074/jbc.M800351200  
47      Uhlen, M., Zhang, C., Lee, S., Sjöstedt, E., Fagerberg, L., Bidkhor, G., Benfeitas, R.,  
48      Arif, M., Liu, Z., Edfors, F., Sanli, K., von Feilitzen, K., Oksvold, P., Lundberg, E.,  
49      Hober, S., Nilsson, P., Mattsson, J., Schwenk, J.M., Brunnström, H., Glimelius,

- 1 B., Sjöblom, T., Edqvist, P.-H., Djureinovic, D., Micke, P., Lindskog, C.,  
2 Mardinoglu, A., Ponten, F., 2017. A pathology atlas of the human cancer  
3 transcriptome. *Science* 357, eaan2507. doi:10.1126/science.aan2507  
4 Våremo, L., Gatto, F., Nielsen, J., 2014. Kiwi: A tool for integration and  
5 visualization of network topology and gene-set analysis. *BMC Bioinformatics*  
6 15. doi:10.1186/s12859-014-0408-9  
7 Våremo, L., Nielsen, J., Nookaew, I., 2013. Enriching the gene set analysis of  
8 genome-wide data by incorporating directionality of gene expression and  
9 combining statistical hypotheses and methods. *Nucleic Acids Res.* 41, 4378–  
10 4391. doi:10.1093/nar/gkt111  
11 Vcelar, S., Jadhav, V., Melcher, M., Auer, N., Hrdina, A., Sagmeister, R., Heffner, K.,  
12 Puklowski, A., Betenbaugh, M., Wenger, T., Leisch, F., Baumann, M., Borth, N.,  
13 2018. Karyotype variation of CHO host cell lines over time in culture  
14 characterized by chromosome counting and chromosome painting.  
15 *Biotechnol. Bioeng.* 115, 165–173. doi:10.1002/bit.26453  
16 Walsh, G., 2014. Biopharmaceutical benchmarks 2014. *Nat. Biotechnol.* 32, 992–  
17 1000. doi:10.1038/nbt.3040  
18 Wang, S.-Y., Gao, K., Deng, D.-L., Cai, J.-J., Xiao, Z.-Y., He, L.-Q., Jiao, H.-L., Ye, Y.-P.,  
19 Yang, R.-W., Li, T.-T., Liang, L., Liao, W.-T., Ding, Y.-Q., 2016. TLE4 promotes  
20 colorectal cancer progression through activation of JNK/c-Jun signaling  
21 pathway. *Oncotarget* 7, 2878–88. doi:10.18632/oncotarget.6694  
22 Wiggins, T., Kumar, S., Markar, S.R., Antonowicz, S., Hanna, G.B., 2015. Tyrosine,  
23 phenylalanine, and tryptophan in gastroesophageal malignancy: a  
24 systematic review. *Cancer Epidemiol. Biomarkers Prev.* 24, 32–8.  
25 doi:10.1158/1055-9965.EPI-14-0980  
26 Wlaschin, K.F., Nissom, P.M., Gatti, M. de L., Ong, P.F., Arleen, S., Tan, K.S., Rink, A.,  
27 Cham, B., Wong, K., Yap, M., Hu, W.-S., 2005. EST sequencing for gene  
28 discovery in Chinese hamster ovary cells. *Biotechnol. Bioeng.* 91, 592–606.  
29 doi:10.1002/bit.20511  
30 Wu, X. cai, Xiao, C. cui, Li, H., Tai, Y., Zhang, Q., Yang, Y., 2016. Down-regulation of  
31 Transducin-Like Enhancer of Split protein 4 in hepatocellular carcinoma  
32 promotes cell proliferation and epithelial-Mesenchymal-Transition.  
33 *Biochem. Biophys. Res. Commun.* 477, 161–166.  
34 doi:10.1016/j.bbrc.2016.06.037  
35 Wurm, F., 2013. CHO Quasispecies—Implications for Manufacturing Processes.  
36 *Processes* 1, 296–311. doi:10.3390/pr1030296  
37 Xiao, S., Shiloach, J., Betenbaugh, M.J., 2014. Engineering cells to improve protein  
38 expression. doi:10.1016/j.sbi.2014.03.005  
39 Xu, X., Nagarajan, H., Lewis, N.E., Pan, S., Cai, Z., Liu, X., Chen, W., Xie, M., Wang, W.,  
40 Hammond, S., Andersen, M.R., Neff, N., Passarelli, B., Koh, W., Fan, H.C., Wang,  
41 Jianbin, Gui, Y., Lee, K.H., Betenbaugh, M.J., Quake, S.R., Famili, I., Palsson,  
42 B.O., Wang, Jun, 2011. The genomic sequence of the Chinese hamster ovary  
43 (CHO)-K1 cell line. *Nat. Biotechnol.* 29, 735–741. doi:10.1038/nbt.1932  
44 Yang, J., Weinberg, R.A., 2008. Epithelial-Mesenchymal Transition: At the  
45 Crossroads of Development and Tumor Metastasis. *Dev. Cell.*  
46 doi:10.1016/j.devcel.2008.05.009  
47 Zhao, M., Kong, L., Liu, Y., Qu, H., 2015. dbEMT: an epithelial-mesenchymal  
48 transition associated gene resource. *Sci. Reports* 2015 5 5, 11459.  
49 doi:10.1038/srep11459

1 Zhu, Y., Meng, Q., Wang, C., Liu, Q., Sun, H., Kaku, T., Liu, K., 2012. Organic anion  
2 transporters involved in the excretion of bestatin in the kidney. *Peptides* 33,  
3 265–271. doi:10.1016/j.peptides.2012.01.007  
4
